# Supplementary material for: Photosynthetic Light Harvesting and Thylakoid Organization in a CRISPR/Cas9 Arabidopsis Thaliana LHCB1 Knockout Mutant
Source: Front Plant Sci. 2022 Mar 7;13:833032. doi: 10.3389/fpls.2022.833032 (PMC8940271; doi:10.3389/fpls.2022.833032)
Supplement: Supplementary file 2 [file Table_1.XLSX]

## Sheet: Figure 1
geno	Weight_mg	Weight_g	Chl_a	Chl_b	Chl_tot	Ratio_ab	Ratio_ChFW	Ratio_Chla_WT	Ratio_Chlb_WT
WT	11.4	0.0114	0.00941379	0.00265742	0.0120712	3.54245	1.05888	0.881667	0.887497
WT	11.4	0.0114	0.0111188	0.00317414	0.0142929	3.50292	1.25376	1.04135	1.06007
WT	11.8	0.0118	0.0114992	0.0031513	0.0146505	3.64905	1.24157	1.07698	1.05244
L1ko - D2	10.7	0.0107	0.00572667	0.00124451	0.00697118	4.60155	0.651512	0.536343	0.415628
L1ko - D2	11.3	0.0113	0.00726873	0.00150668	0.00877541	4.82434	0.776585	0.680767	0.503185
L1ko - D2	15.2	0.0152	0.00855777	0.00201772	0.0105755	4.24131	0.695756	0.801495	0.673857
L1ko - C2a	10.8	0.0108	0.0076704	0.00162431	0.00929471	4.72225	0.860621	0.718387	0.54247
L1ko - C2a	10.3	0.0103	0.00803379	0.00173581	0.0097696	4.62827	0.948505	0.752421	0.579707
L1ko - C2a	13.5	0.0135	0.00869826	0.0018346	0.0105329	4.74123	0.780212	0.814653	0.6127
L1ko - C2b	13.2	0.0132	0.0103918	0.00244088	0.0128327	4.25741	0.972174	0.973267	0.815179
L1ko - C2b	13.3	0.0133	0.00758868	0.0015503	0.00913898	4.89498	0.687141	0.710733	0.517753
L1ko - C2b	13.4	0.0134	0.0078447	0.0017893	0.009634	4.38423	0.718955	0.734711	0.597571
Weight_mg : Weight in mg
Weight_g : Weight in g
Chl_a : Chlorophyll a accumulation normalized over the plant fresh weight, left, and chlorophyll a/b ratio, right, in WT and in three L1ko mutant lines.
Chl_b : Chlorophyll b accumulation normalized over the plant fresh weight, left, and chlorophyll a/b ratio, right, in WT and in three L1ko mutant lines.
Chl_tot: Total chlorophyll accumulation normalized over the plant fresh weight, left, and chlorophyll a/b ratio, right, in WT and in three L1ko mutant lines.
Ratio_ab : ratio chlorophyll a / chlorophyll b
Ratio_ChFW : ratio of the total chlorophyll, normalized over fresh weight, in the sample and the average accumulation of chlorophyll in the three WT samples
Ratio_Chla_WT : ratio of the chlorophyll a, normalized over fresh weight, in the sample and the average accumulation of chlorophyll a in the three WT samples
Ratio_Chlb_WT : ratio of the chlorophyll b, normalized over fresh weight, in the sample and the average accumulation of chlorophyll b in the three WT samples

## Sheet: Figure 2
Prot	quant	comp
Lhcb2	2.15493	LHCII
Lhcb2	1.74324	LHCII
Lhcb2	1.14737	LHCII
Lhcb2	1.21311	LHCII
Lhcb2	1.24022	LHCII
Lhcb2	1.25243	LHCII
Lhcb3	0.928571	LHCII
Lhcb3	0.736264	LHCII
Lhcb3	1.03509	LHCII
Lhcb4	1.29333	LHCII
Lhcb4	1.40964	LHCII
Lhcb4	1.0177	LHCII
Lhcb4	1.18012	LHCII
Lhcb4	1.32164	LHCII
Lhcb4	1.41361	LHCII
Lhcb5	1.09804	LHCII
Lhcb5	1.12346	LHCII
Lhcb5	0.622478	LHCII
Lhcb6	1.03268	LHCII
Lhcb6	1.25926	LHCII
Lhcb6	0.985591	LHCII
Lhcb2-P	0.333333	LHCII
Lhcb2-P	0.218391	LHCII
Lhcb2-P	0.166667	LHCII
PsbC	0.815166	PSII
PsbC	0.977273	PSII
PsbC	0.971154	PSII
PsbD	0.87234	PSII
PsbD	0.994709	PSII
PsbD	0.89899	PSII
PsbB	1.12169	PSII
PsbB	1.00513	PSII
PsbB	1.0989	PSII
PsbB	0.882979	PSII
PsbB	0.984127	PSII
PsbB	1.23232	PSII
PsbA	0.878307	PSII
PsbA	1.01538	PSII
PsbA	1.24176	PSII
PPsbA	0.271605	PSII
PPsbA	0.188119	PSII
PPsbA	0.12987	PSII
PsaB	0.901408	PSI
PsaB	0.959459	PSI
PsaB	0.789474	PSI
psaC	1.03268	PSI
psaC	0.790123	PSI
psaC	0.458213	PSI
PsaD	0.904762	PSI
PsaD	0.802198	PSI
PsaD	0.833333	PSI
Lhca1	1.17045	LHCI
Lhca1	1.21788	LHCI
Lhca1	1.27568	LHCI
Lhca2	0.938389	LHCI
Lhca2	1	LHCI
Lhca2	1.10577	LHCI
Lhca3	0.976744	LHCI
Lhca3	1.01911	LHCI
Lhca3	0.859813	LHCI
Lhca4	1.11538	LHCI
Lhca4	1.1236	LHCI
Lhca4	1.28571	LHCI
AtpC	0.986667	ATP Syn
AtpC	1.10843	ATP Syn
AtpC	1.0885	ATP Syn
STN7	0.308642	Kin/phos
STN7	0.207921	Kin/phos
STN7	0.142857	Kin/phos
PBCP	0.878788	Kin/phos
PBCP	0.984615	Kin/phos
PBCP	1.47239	Kin/phos
PPH1	0.616279	Kin/phos
PPH1	0.687898	Kin/phos
PPH1	0.570093	Kin/phos
PsaD	0.866397	PSI
PsaD	0.664577	PSI
PsaD	0.926014	PSI
Lhcb2	1.46559	LHCII
Lhcb2	1.14107	LHCII
Lhcb2	1.42243	LHCII
PetC	1.2	Cyt B6f
PetC	0.858491	Cyt B6f
PetC	1.20536	Cyt B6f
PetC	0.801619	Cyt B6f
PetC	0.677116	Cyt B6f
PetC	0.849642	Cyt B6f
PsaH	0.825911	PSI
PsaH	0.815047	PSI
PsaH	0.801909	PSI
PsbA	0.906883	PSII
PsbA	1.05329	PSII
PsbA	1.19332	PSII
STN8	0.92	Kin/phos
STN8	1.22892	Kin/phos
STN8	1.09735	Kin/phos
Lhcb5	1.20567	LHCII
Lhcb5	0.811594	LHCII
Lhcb5	1.09028	LHCII
Lhcb5	1.69072	LHCII
Lhcb5	1.75455	LHCII
Lhcb5	1.73109	LHCII
Lhcb6	1.09655	LHCII
Lhcb6	0.919643	LHCII
Lhcb6	0.617021	LHCII
Lhcb6	1.22826	LHCII
Lhcb6	0.878049	LHCII
Lhcb6	1.104	LHCII

## Sheet: Figure 3
			Panel A	Panel B	Panel E			Panel C
geno	replicate	mesure	PSIIPR (A)	PSIPR (B)	RatioPSIIPSI (E )			geno	PSIovertotPS
WT	rep1	ECS	22.0423	37.1563	1.16421			WT	0.506667
L1ko	rep1	ECS	14.0127	38.9709	1.81437			WT	0.515753
WT	rep2	ECS	15.0779	36.4983	1.30059			WT	0.526477
L1ko	rep2	ECS	17.0023	51.8388	1.68644			L1ko	0.595784
WT	rep3	ECS	23.619	46.2964	1.64595			L1ko	0.592832
L1ko	rep3	ECS	13.8471	47.608	1.63399			L1ko	0.599394
WT	rep1	Fluo	21.1854
L1ko	rep1	Fluo	10.1279
WT	rep2	Fluo	16.2611
L1ko	rep2	Fluo	15.5463
WT	rep3	Fluo	25.9818
L1ko	rep3	Fluo	12.4698
Panel D					Panel F
time	geno	VJ			geno	CEFperc
0.05	WT	0.9312			WT	5.12531
0.1	WT	0.8095			WT	8.09652
0.2	WT	0.7242			WT	3.53875
0.4	WT	0.6394			L1ko	1.34664
0.8	WT	0.5275			L1ko	7.39302
1.6	WT	0.3981			L1ko	6.82632
0.05	WT	0.9112
0.1	WT	0.8197
0.2	WT	0.7366
0.4	WT	0.6522
0.8	WT	0.5287
1.6	WT	0.4396
0.05	WT	0.9282
0.1	WT	0.8257
0.2	WT	0.7364
0.4	WT	0.6373
0.8	WT	0.4855
1.6	WT	0.3805
0.05	WT	0.9227
0.1	WT	0.8266
0.2	WT	0.7262
0.4	WT	0.6341
0.8	WT	0.4903
1.6	WT	0.3959
0.05	WT	0.9221
0.1	WT	0.8233
0.2	WT	0.7275
0.4	WT	0.6311
0.8	WT	0.4895
1.6	WT	0.4003
0.05	WT	0.9225
0.1	WT	0.8236
0.2	WT	0.7331
0.4	WT	0.6262
0.8	WT	0.5265
1.6	WT	0.4386
0.05	WT	0.9211
0.1	WT	0.843
0.2	WT	0.7629
0.4	WT	0.661
0.8	WT	0.5489
1.6	WT	0.4256
0.05	Lhcb1KO	0.8956
0.1	Lhcb1KO	0.8046
0.2	Lhcb1KO	0.705
0.4	Lhcb1KO	0.5744
0.8	Lhcb1KO	0.449
1.6	Lhcb1KO	0.3264
0.05	Lhcb1KO	0.8916
0.1	Lhcb1KO	0.7884
0.2	Lhcb1KO	0.6717
0.4	Lhcb1KO	0.537
0.8	Lhcb1KO	0.4215
1.6	Lhcb1KO	0.2981
0.05	Lhcb1KO	0.9155
0.1	Lhcb1KO	0.8077
0.2	Lhcb1KO	0.7098
0.4	Lhcb1KO	0.6244
0.8	Lhcb1KO	0.5031
1.6	Lhcb1KO	0.3758
0.05	Lhcb1KO	0.9089
0.1	Lhcb1KO	0.7995
0.2	Lhcb1KO	0.7154
0.4	Lhcb1KO	0.6196
0.8	Lhcb1KO	0.5109
1.6	Lhcb1KO	0.3825
0.05	Lhcb1KO	0.9141
0.1	Lhcb1KO	0.7958
0.2	Lhcb1KO	0.6939
0.4	Lhcb1KO	0.5971
0.8	Lhcb1KO	0.4522
1.6	Lhcb1KO	0.3333
0.05	Lhcb1KO	0.9198
0.1	Lhcb1KO	0.8086
0.2	Lhcb1KO	0.7199
0.4	Lhcb1KO	0.6213
0.8	Lhcb1KO	0.5028
1.6	Lhcb1KO	0.3762
0.05	Lhcb1KO	0.9103
0.1	Lhcb1KO	0.7955
0.2	Lhcb1KO	0.7095
0.4	Lhcb1KO	0.6094
0.8	Lhcb1KO	0.4912
1.6	Lhcb1KO	0.3614

## Sheet: Figure 4
																							Fm	112.341	107.172	92.9224	91.1144	82.3309	67.2509
light	geno	PSII	NPQ	negqP	negqL																		Fm_StII	93.5453	88.3667	72.7573	74.8703	66.454	57.1116
0	WT	0.804077	0	0	0																		Fm_StI	103.49	97.8598	79.0706	75.5755	67.9669	57.9156
40	WT	0.704842	0.329161	0.050267	0.170305																		Fm_StII	98.2235	92.948	73.8094	76.4564	69.0725	58.2359
95	WT	0.697406	0.415756	0.0498016	0.164582																										qT	WT	L1ko
150	WT	0.66693	0.475176	0.0811959	0.24378																		qT (FmStI-FmStII)/Fm	0.0885251	0.0885777	0.0679421	0.00773988	0.0183755	0.011956		St2->St1	0.0816816	0.0126905
380	WT	0.517314	0.820083	0.219273	0.454277																			0.046882	0.0458306	0.0566198	-0.00966779	-0.013429	-0.00476202		St1->St2	0.0497775	-0.00928629
620	WT	0.40812	1.20887	0.326293	0.551283
850	WT	0.331737	1.56477	0.38361	0.574041																											0.0118988	0.00535574
0	WT	0.790248	0	0	0																											0.00594894	0.00434609
40	WT	0.691018	0.374174	0.0707262	0.228901
95	WT	0.691955	0.469051	0.0673009	0.218477																		time	WT_1	WT_2	WT_3	L1ko_1	L1ko_2	L1ko_3
150	WT	0.659671	0.528528	0.0998868	0.293501																		0.04	21.599	20.876	17.885	17.913	16.126	12.98
380	WT	0.496359	0.908346	0.26491	0.525989																		2.04	20.992	20.427	17.813	17.053	15.964	12.812
620	WT	0.382035	1.40446	0.366392	0.5929																		4.04	21.274	20.782	17.705	17.598	16.088	13.115
850	WT	0.300752	1.87088	0.436669	0.624483																		6.04	21.301	20.927	17.188	17.675	16.338	12.825
0	WT	0.822737	0	0	0																		7.96	21.403	20.595	17.222	17.549	15.939	12.614
40	WT	0.691833	0.343166	0.098262	0.31886																		8.08	117.911	105.639	133.083	98.535	85.72	108.283
95	WT	0.685461	0.464908	0.0937067	0.297918																		8.16	114.387	107.909	95.34	93.896	83.648	69.306
150	WT	0.652825	0.567716	0.128485	0.370088																		8.24	110.715	105.253	91.536	89.302	79.684	65.965
380	WT	0.497662	0.989648	0.274645	0.546735																		8.32	110.462	105.651	92.203	88.819	80.057	66.183
620	WT	0.388499	1.51313	0.365107	0.597067																		8.4	110.765	106.14	92.755	89.033	80.925	67.228
850	WT	0.299445	1.96559	0.446484	0.637329																		8.48	115.841	111.122	92.832	96.766	89.532	67.354
0	WT	0.819811	0	0	0																		8.56	112.127	106.279	93.003	89.832	81.565	67.318
40	WT	0.676573	0.341585	0.103363	0.319585																		8.64	111.796	107.526	92.883	90.264	81.297	67.39
95	WT	0.697867	0.445024	0.0829125	0.274424																		8.72	112.632	107.495	92.827	91.003	81.939	67.263
150	WT	0.679034	0.497881	0.0958763	0.298712																		8.92	61.612	60.44	59.397	53.226	49.012	41.661
380	WT	0.538305	0.806401	0.233502	0.505749																		10.04	53.061	50.942	51.035	42.221	38.594	33.024
620	WT	0.422434	1.19073	0.345942	0.598964																		10.84	50.148	48.619	52.721	39.717	34.636	30.537
850	WT	0.344871	1.57569	0.41436	0.632487																		11.64	52.42	51.261	56.849	40.512	36.384	32.793
0	L1ko	0.770919	0	0	0																		12.44	51.734	50.03	55.962	38.303	34.993	32.045
40	L1ko	0.696249	0.351903	0.000236461	0.000939863																		13.24	49.214	47.347	55.006	35.498	32.382	31.14
95	L1ko	0.684844	0.433854	0.0384649	0.13946																		14.04	46.586	44.528	52.923	33.272	29.498	29.366
150	L1ko	0.659708	0.493754	0.0636227	0.211009																		14.84	44.343	41.861	50.6	30.91	27.161	27.928
380	L1ko	0.528857	0.795368	0.219966	0.484197																		15.64	42.486	39.628	48.624	29.999	25.595	26.89
620	L1ko	0.42856	1.1171	0.322062	0.575701																		16.44	40.663	37.998	46.548	28.233	24.601	25.471
850	L1ko	0.350076	1.49798	0.397241	0.607126																		17.24	39.363	36.335	44.019	27.33	23.885	24.382
0	L1ko	0.819733	0	0	0																		18.04	38.06	34.988	42.91	26.537	22.855	23.963
40	L1ko	0.748409	0.270307	0.00220058	0.00883634																		18.84	37.495	34.301	41.03	25.894	22.482	23.351
95	L1ko	0.724187	0.351958	0.0385115	0.138465																		19.64	37.302	33.702	39.344	26.073	22.2	22.44
150	L1ko	0.698483	0.394749	0.0412424	0.140797																		20.44	36.673	33.376	38.405	25.779	22.076	22.381
380	L1ko	0.545709	0.623921	0.193599	0.44474																		25.84	35.362	31.949	33.77	24.969	20.977	19.75
620	L1ko	0.440574	0.835527	0.300235	0.560064																		35.84	33.11	30.314	31.063	24.784	21.072	18.802
850	L1ko	0.345703	1.10009	0.373775	0.605743																		45.84	31.437	29.837	28.455	23.934	21.678	18.116
0	L1ko	0.81653	0	0	0																		55.84	30.827	28.888	27.586	23.427	21.035	17.776
40	L1ko	0.750962	0.312039	0.00707652	0.027626																		65.84	30.712	29.189	28.241	21.634	19.957	17.699
95	L1ko	0.721867	0.39768	0.0364198	0.128258																		75.84	32.538	30.762	29.413	21.513	19.488	16.586
150	L1ko	0.707078	0.473449	0.0379371	0.127622																		85.84	32.62	31.632	30.617	21.249	19.035	16.612
380	L1ko	0.564691	0.692223	0.181178	0.422141																		95.84	31.581	30.336	30.631	20.625	18.265	16.436
620	L1ko	0.463928	0.995576	0.303964	0.556702																		105.84	30.458	29.774	30.134	20.26	18.382	16.186
850	L1ko	0.382948	1.2267	0.370254	0.591825																		115.84	29.361	28.62	28.915	19.67	18.195	15.584
0	L1ko	0.819203	0	0	0																		125.84	29.313	28.226	27.65	19.877	17.98	15.101
40	L1ko	0.743846	0.263447	0.00397705	0.0130931																		135.84	28.546	27.978	27.357	19.475	18.009	15.323
95	L1ko	0.716043	0.278927	0.0184402	0.0585114																		145.84	28.2	26.85	25.972	19.333	17.155	14.609
150	L1ko	0.70274	0.322151	0.0458238	0.13466																		155.84	27.667	27.007	25.255	18.982	17.547	14.208
380	L1ko	0.570811	0.561719	0.162997	0.345961																		165.84	26.897	26.463	24.8	18.677	17.412	14.213
620	L1ko	0.453991	0.753894	0.272193	0.476328																		175.84	26.849	26.718	24.442	19.058	17.741	14.156
850	L1ko	0.374387	0.933244	0.347805	0.535147																		185.84	27.533	26.719	23.867	19.469	17.807	13.954
0	WT	0.804563	0	0	0																		195.84	27.08	25.947	22.99	19.081	17.401	13.662
40	WT	0.693733	0.371282	0.0764387	0.249582																		205.84	26.812	25.955	22.8	19.186	17.208	13.67
95	WT	0.691667	0.513564	0.0546816	0.177346																		215.84	26.457	25.543	22.706	18.931	17.117	13.963
150	WT	0.660133	0.602072	0.0845005	0.248628																		225.84	26.364	25.946	22.522	18.962	17.481	13.987
380	WT	0.488963	1.17366	0.23443	0.458733																		235.84	26.583	25.596	21.813	19.307	17.521	13.691
620	WT	0.369415	1.69343	0.34453	0.546366																		245.84	26.551	25.267	21.93	19.33	17.516	13.821
850	WT	0.285722	2.19854	0.395813	0.554145																		255.84	25.236	25.122	21.041	18.678	17.567	13.689
0	L1ko	0.820364	0	0	0																		265.84	26.249	25.155	21.129	19.499	17.162	13.392
40	L1ko	0.749749	0.356841	0.00946906	0.0378382																		275.84	25.856	25.121	20.639	19.48	17.622	13.573
95	L1ko	0.728645	0.442546	0.0161659	0.0595748																		285.84	25.712	25.063	20.131	19.263	17.771	13.062
150	L1ko	0.699353	0.516753	0.0479441	0.15947																		295.84	25.082	24.589	20.196	18.736	17.208	13.701
380	L1ko	0.558936	0.828262	0.182673	0.414164																		305.84	25.32	24.139	19.75	19.052	17.259	13.448
620	L1ko	0.441397	1.1712	0.294977	0.528061																		315.84	25.032	24.53	19.777	19	17.287	13.784
850	L1ko	0.354441	1.49598	0.343086	0.531455																		325.84	24.831	23.959	19.218	18.546	16.959	13.342
																							335.84	24.757	23.988	19.573	18.629	17.027	13.623
																							345.84	24.642	24.085	18.995	18.736	17.372	13.523
																							355.84	24.577	23.746	19.007	18.62	17.023	13.594
																							365.84	24.593	23.083	18.342	18.961	16.618	13.271
																							375.84	24.213	23.965	18.405	18.604	17.393	13.53
																							385.84	24.557	23.435	18.047	19.013	17.306	13.534
																							395.84	24.497	22.895	17.971	18.936	16.823	13.573
																							405.84	24.029	23.812	18.177	18.811	17.463	13.538
																							415.84	23.93	23.376	17.641	18.53	17.124	13.32
																							425.84	23.714	23.089	17.703	18.951	17.036	13.279
																							435.84	23.537	23.651	17.525	18.48	17.329	13.546
																							445.84	23.742	22.75	18.004	18.918	17.182	13.804
																							455.84	24.007	23.227	17.045	19.204	17.351	12.815
																							465.84	23.828	22.741	17.689	18.672	17.427	13.539
																							475.84	23.391	22.945	17.024	18.43	16.831	13.045
																							485.84	22.991	22.892	16.754	18.125	17.312	13.053
																							495.84	23.375	23.44	17.093	18.796	17.63	13.501
																							505.84	23.173	23.186	16.749	18.8	17.576	13.295
																							515.84	23.39	22.703	17.027	18.693	17.082	13.637
																							525.84	23.634	22.32	17.018	19.014	16.967	13.108
																							535.84	23.594	22.508	17.214	18.668	17.102	13.325
																							545.84	23.397	23.076	16.807	18.514	17.262	13.367
																							555.84	23.405	22.062	16.686	18.706	16.732	13.307
																							565.84	23.185	22.496	17.117	18.427	17.08	13.619
																							575.84	23.315	22.735	16.992	18.819	17.276	13.544
																							585.84	23.289	22.079	17.154	18.611	16.549	13.565
																							595.84	23.587	22.526	16.755	18.719	17.131	13.262
																							601.84	23.131	22.62	16.951	18.529	16.819	13.214
																							602.84	23.446	22.637	16.857	18.43	16.863	13.508
																							604.04	23.482	22.501	17.136	18.659	16.916	13.563
																							604.96	23.3	22.853	17.202	18.506	17.005	13.82
																							605.08	106.985	98.025	88.366	89.457	78.065	74.882
																							605.16	94.105	87.927	75.167	74.841	66.075	58.19
																							605.24	93.181	87.792	73.165	74.047	66.497	57.519
																							605.32	93.686	88.217	72.695	74.482	66.168	56.799
																							605.4	92.979	88.009	72.327	74.533	66.246	56.738
																							605.48	93.209	88.295	72.004	74.885	65.883	56.9
																							605.56	93.872	88.985	71.878	75.267	66.818	57.017
																							605.64	93.785	89.342	72.065	76.037	67.491	56.618
																							605.72	94.894	89.818	72.101	75.543	67.673	56.652
																							605.92	36.51	35.733	28.841	28.71	26.447	21.908
																							610.84	23.882	23.003	17.543	18.761	17.093	13.469
																							611.84	23.443	21.861	16.688	18.537	16.486	13.536
																							612.84	22.967	22.03	16.443	18.703	16.953	13.458
																							613.84	22.902	22.134	16.472	18.701	17.321	13.531
																							614.84	23.15	21.731	16.184	18.804	16.855	13.118
																							615.84	22.637	22.342	16.188	18.576	17.133	13.345
																							616.84	23.222	21.792	16.476	18.593	16.841	13.296
																							617.84	23.15	22.555	16.286	18.965	17.233	13.345
																							618.84	23.214	21.718	16.659	19.053	17.245	13.457
																							619.84	22.74	21.771	16.172	18.534	17.004	13.107
																							625.84	22.663	21.76	16.644	18.798	17.161	13.571
																							635.84	22.946	21.918	16.067	18.292	17.298	13.037
																							645.84	23.375	21.916	16.327	18.97	16.825	13.273
																							655.84	22.81	21.995	16.414	18.539	17.424	13.217
																							665.84	22.951	22.301	16.437	18.874	16.982	13.394
																							675.84	22.952	22.128	16.169	18.624	17.253	12.871
																							685.84	23.369	21.954	16.535	18.667	17.186	13.509
																							695.84	22.873	21.877	16.389	18.562	17.104	13.218
																							705.84	23.195	22.274	16.561	18.881	17.396	13.527
																							715.84	22.79	22.544	16.849	18.798	17.416	13.683
																							725.84	23.274	22.084	16.468	18.85	17.299	13.452
																							735.84	23.368	22.063	16.722	18.855	17.074	13.537
																							745.84	23.221	22.419	16.501	19.187	17.389	13.106
																							755.84	22.863	21.788	16.129	18.322	16.626	13.315
																							765.84	22.822	22.113	16.549	18.499	16.836	13.69
																							775.84	23.236	22.097	16.581	18.745	17.002	13.324
																							785.84	23.522	22.394	16.629	18.705	17.177	13.359
																							795.84	23.218	21.655	16.274	18.709	16.542	12.944
																							805.84	22.907	21.852	16.746	18.554	17.097	13.636
																							815.84	22.942	22.341	16.822	18.555	16.863	13.581
																							825.84	23.543	21.95	16.802	18.581	17.068	13.468
																							835.84	23.469	22.461	16.883	18.979	17.475	13.243
																							845.84	23.337	22.387	16.568	18.506	17.349	13.412
																							855.84	23.856	22.578	16.838	18.868	17.327	13.537
																							865.84	23.856	22.297	16.801	19.115	17.095	13.389
																							875.84	23.453	21.929	16.677	18.469	16.58	13.406
																							885.84	23.92	22.172	16.654	19.115	17.192	13.045
																							895.84	23.549	22.315	16.988	18.523	17.025	13.616
																							905.84	23.196	22.269	16.592	18.079	17.186	13.071
																							915.84	22.942	22.566	16.635	17.832	16.794	13.431
																							925.84	23.252	22.887	16.76	18.258	17.257	13.055
																							935.84	23.736	22.467	16.993	18.568	16.871	13.777
																							945.84	23.784	22.814	16.856	18.985	17.263	13.372
																							955.84	23.788	23.12	16.952	18.748	17.534	13.236
																							965.84	23.517	23.219	17.4	18.289	17.479	13.797
																							975.84	23.852	23.191	16.802	18.668	17.312	13.565
																							985.84	23.605	22.131	17.235	18.44	16.557	13.667
																							995.84	24.22	22.656	17.164	19.37	17.143	13.424
																							1005.84	23.859	22.594	16.952	18.604	16.94	13.126
																							1015.84	23.787	22.48	17.225	18.506	16.79	13.478
																							1025.84	24.278	22.531	16.95	19.029	16.778	13.237
																							1035.84	23.946	23.023	17.415	18.514	17.066	13.586
																							1045.84	23.632	23.397	17.173	18.273	17.356	13.511
																							1055.84	24.144	22.631	16.955	18.616	16.863	13.268
																							1065.84	24.182	23.264	17.266	18.523	16.904	13.424
																							1075.84	24.324	23.385	17.455	18.615	17.402	13.551
																							1085.84	24.044	22.738	17.124	18.493	16.709	13.372
																							1095.84	24.229	22.507	16.729	18.586	16.832	12.816
																							1105.84	24.362	22.726	17.178	18.759	17.078	13.181
																							1115.84	24.08	22.972	17.164	18.568	16.553	13.301
																							1125.84	24.666	22.788	17.398	18.656	16.924	13.549
																							1135.84	24.399	22.954	17.436	18.519	16.977	13.567
																							1145.84	24.341	23.066	17.417	18.634	16.98	13.339
																							1155.84	24.135	23.506	17.197	18.357	17.416	13.076
																							1165.84	24.334	23.242	17.279	18.549	17.211	13.266
																							1175.84	23.791	23.604	17.51	18.15	17.435	13.433
																							1185.84	24.062	23.551	17.6	18.072	17.208	13.719
																							1195.84	24.738	23.61	17.71	18.481	16.766	13.484
																							1201.84	24.312	23.559	17.607	18.51	17.472	13.387
																							1202.84	24.609	22.916	17.353	18.607	16.656	13.212
																							1204.04	24.415	23.055	17.618	18.346	16.747	13.373
																							1204.96	25.363	24.255	18.131	18.836	17.295	13.424
																							1205.08	121.359	109.021	98.703	89.618	78.416	75.233
																							1205.16	104.085	98.343	81.979	76.026	67.381	60.327
																							1205.24	103.431	96.445	79.533	75.037	66.836	58.972
																							1205.32	102.89	96.864	78.338	74.771	67.216	57.319
																							1205.4	103.224	98.203	78.185	75.414	68.105	57.251
																							1205.48	103.772	97.701	78.644	75.636	68.359	57.675
																							1205.56	103.278	98.272	78.447	75.812	68.025	57.375
																							1205.64	103.627	98.591	78.918	75.737	68.619	57.319
																							1205.72	103.615	98.459	78.521	76.171	69.194	57.087
																							1205.92	43.799	42.058	33.183	30.252	28.481	23.573
																							1210.84	28.028	26.315	20.123	18.745	16.745	13.478
																							1211.84	28.878	27.583	20.445	18.26	16.856	13.199
																							1212.84	29.278	27.729	21.256	18.098	16.943	13.706
																							1213.84	29.915	28.63	21.519	18.703	17.328	13.46
																							1214.84	30.07	28.686	21.43	18.484	16.924	13.06
																							1215.84	29.63	28.792	21.584	18.351	16.898	13.464
																							1216.84	29.897	28.613	21.789	18.416	17.028	13.105
																							1217.84	30.337	28.531	21.985	18.614	16.616	13.367
																							1218.84	30.077	29.02	22.286	18.634	16.86	13.431
																							1219.84	29.508	29.002	21.954	18.097	17.173	13.471
																							1225.84	30.323	28.662	22.006	18.777	16.982	13.606
																							1230.84	29.517	28.558	21.564	18.625	17.059	13.382
																							1235.84	29.417	28.454	21.223	18.834	17.242	12.99
																							1240.84	29.276	27.522	20.97	18.679	16.822	13.082
																							1245.84	28.994	27.983	21.26	18.988	17.226	13.396
																							1250.84	28.367	27.861	21.007	18.564	17.263	13.331
																							1255.84	28.334	27.276	20.83	18.417	16.994	13.335
																							1260.84	27.727	27.18	20.571	18.547	16.748	13.208
																							1265.84	27.978	27.106	20.441	18.399	17.194	13.282
																							1270.84	27.639	27.005	20.502	18.081	17.106	13.504
																							1275.84	27.388	26.539	20.196	18.496	16.806	13.197
																							1280.84	27.671	26.03	20.021	18.651	16.515	12.956
																							1285.84	27.103	26.706	19.933	18.653	17.318	13.42
																							1290.84	27.331	25.702	20.06	18.736	16.849	13.483
																							1295.84	26.978	25.797	19.883	18.723	17.105	13.414
																							1300.84	26.802	25.974	19.881	18.459	17.101	13.394
																							1305.84	26.798	25.327	19.225	18.42	16.421	13.264
																							1310.84	26.501	25.69	19.105	18.646	16.94	13.17
																							1315.84	26.242	25.399	19.193	18.323	16.728	13.17
																							1320.84	26.379	25.242	19.134	18.731	16.973	13.094
																							1325.84	26.379	24.893	19.231	18.523	16.726	13.725
																							1330.84	25.983	25.296	18.566	18.505	17.027	12.891
																							1335.84	25.454	24.974	18.186	18.396	16.985	13.009
																							1340.84	25.631	24.611	18.511	18.408	16.826	13.234
																							1345.84	25.511	24.919	19.072	18.291	16.968	13.738
																							1350.84	25.435	24.805	18.551	18.46	17.053	13.29
																							1355.84	25.358	24.307	18.813	18.312	16.73	13.626
																							1360.84	25.35	24.32	18.55	18.226	16.501	13.494
																							1365.84	25.13	24.729	18.524	18.161	17.322	13.715
																							1370.84	25.279	24.039	17.89	18.382	17.074	13.077
																							1375.84	24.865	24.57	18.046	18.522	17.326	13.208
																							1380.84	25.126	24.096	18.056	18.567	16.921	13.075
																							1385.84	24.69	24.066	17.878	18.348	17.268	13.384
																							1390.84	24.719	24.018	17.958	18.386	17.356	13.468
																							1395.84	24.427	23.775	17.726	18.315	16.713	13.245
																							1400.84	25.071	24.079	17.862	18.775	17.496	13.519
																							1405.84	24.367	23.581	17.589	18.331	17.173	13.07
																							1410.84	24.167	23.765	17.858	18.163	17.1	13.197
																							1415.84	24.353	23.752	18.127	18.499	16.912	13.62
																							1420.84	24.701	23.49	17.517	18.694	17.106	13.267
																							1425.84	24.399	23.233	17.405	18.392	17.184	13.433
																							1430.84	24.246	23.741	17.277	18.128	17.326	13.018
																							1435.84	24.036	23.531	17.664	18.187	17.002	13.352
																							1440.84	24.438	23.542	17.234	18.434	17.207	13.161
																							1445.84	24.477	23.706	17.28	18.489	17.161	13.249
																							1450.84	24.485	23.133	17.67	18.558	16.529	13.66
																							1455.84	24.306	23.642	17.129	18.398	16.98	13.463
																							1460.84	24.231	23.46	17.478	18.363	16.868	13.275
																							1465.84	24.446	22.898	17.268	18.567	16.848	13.309
																							1470.84	24.419	23.554	17.341	18.61	17.259	13.18
																							1475.84	23.88	23.443	17.079	18.281	16.755	13.34
																							1480.84	23.544	22.988	17.303	17.979	17.125	13.321
																							1485.84	24.51	22.919	17.176	18.421	16.844	13.416
																							1490.84	23.934	23.349	16.948	18.418	17.049	12.994
																							1495.84	23.488	23.085	17.368	17.94	16.989	13.28
																							1500.84	24.31	23.098	17.042	19.05	16.946	13.291
																							1505.84	24.026	23.3	16.915	18.68	17.382	13.104
																							1510.84	23.781	23.065	16.854	18.189	16.836	13.157
																							1515.84	23.887	22.798	17.036	18.413	16.713	13.351
																							1520.84	23.733	22.659	16.94	18.387	16.511	13.134
																							1525.84	24.151	23.561	16.961	18.467	17.213	12.945
																							1530.84	24.168	22.736	17.231	18.497	16.667	13.381
																							1535.84	23.633	23.003	16.906	17.996	17.015	12.96
																							1540.84	23.98	23.097	17.002	18.573	16.851	13.41
																							1545.84	24.011	22.416	17.272	18.469	16.455	13.532
																							1550.84	24.061	22.827	16.692	18.689	16.518	12.974
																							1555.84	24.007	23.234	16.865	18.54	17.252	13.051
																							1560.84	23.798	22.633	17.215	18.176	16.956	13.09
																							1565.84	24.105	22.853	16.923	18.587	17.173	13.392
																							1570.84	23.854	22.907	16.667	18.517	16.852	13.01
																							1575.84	24.273	22.734	16.801	18.762	16.858	13.148
																							1580.84	23.967	22.917	16.742	18.58	17.011	12.876
																							1585.84	24.436	23.38	16.899	18.638	17.39	13.185
																							1590.84	23.708	22.737	17.029	18.469	17.023	13.243
																							1595.84	23.731	23.378	17.18	18.088	16.913	13.205
																							1600.84	23.719	22.222	16.587	18.493	16.431	13.046
																							1605.84	23.661	23.076	16.887	18.369	16.862	13.38
																							1610.84	23.756	22.661	16.959	18.126	16.576	13.112
																							1615.84	24.291	22.996	16.982	19.003	17.082	13.097
																							1620.84	23.527	23.141	16.949	18.285	17.157	13.334
																							1625.84	23.828	23.228	17.176	18.469	17.445	13.57
																							1630.84	23.62	22.996	16.756	18.175	17.196	13.234
																							1635.84	23.896	22.945	16.738	18.706	17.152	13.166
																							1640.84	23.338	23.238	16.764	18.208	16.831	13.042
																							1645.84	23.883	23.399	16.992	18.435	17.261	13.21
																							1650.84	23.662	22.96	16.676	18.271	16.937	12.817
																							1655.84	24.184	23.161	16.983	18.325	17.056	13.465
																							1660.84	23.719	22.812	16.972	18.365	17.167	13.29
																							1665.84	23.676	22.819	17.072	18.139	16.918	13.257
																							1670.84	23.777	22.788	17.279	18.315	17.032	13.398
																							1675.84	23.846	22.755	16.723	18.244	16.745	13.091
																							1680.84	23.628	22.651	16.78	18.288	16.892	13.454
																							1685.84	23.851	23.14	16.666	18.363	17.242	13.195
																							1690.84	23.79	22.674	16.686	18.536	16.58	12.96
																							1695.84	24.288	22.53	16.399	18.773	16.715	12.625
																							1700.84	23.526	22.503	16.905	17.999	16.751	13.283
																							1705.84	23.615	22.32	16.981	18.202	16.709	13.215
																							1710.84	23.695	22.985	16.951	18.04	17.27	13.188
																							1715.84	23.797	22.922	17.146	18.843	16.906	13.375
																							1720.84	24.133	22.387	16.8	18.78	16.485	12.966
																							1725.84	24.046	22.826	16.887	18.476	16.978	13.369
																							1730.84	23.54	22.95	16.814	17.947	16.77	13.068
																							1735.84	23.641	23.065	16.97	18.373	17.147	13.354
																							1740.84	23.245	22.924	17.181	18.015	17.314	13.255
																							1745.84	23.799	22.915	16.841	18.331	16.864	12.851
																							1750.84	23.932	22.736	16.396	18.754	17.098	12.707
																							1755.84	23.871	22.48	16.942	18.713	16.811	13.297
																							1760.84	23.641	22.855	16.986	18.194	17.02	13.443
																							1765.84	23.971	23.288	17.118	18.364	17.021	12.879
																							1770.84	23.845	23.235	17.214	18.632	17.247	13.206
																							1775.84	23.943	22.588	16.772	18.393	16.815	13.041
																							1780.84	24.153	22.224	16.815	18.859	16.536	12.949
																							1785.84	23.647	22.687	16.476	18.261	16.769	12.503
																							1790.84	23.734	22.369	16.971	18.683	16.567	13.146
																							1795.84	23.881	23.523	16.766	18.35	17.428	13.109
																							1801.84	23.444	23.058	17.003	18.366	17.216	13.254
																							1802.84	23.42	22.745	16.614	18.205	17.185	13.046
																							1804.04	23.571	22.786	16.522	18.319	16.896	12.731
																							1808.96	23.711	23.315	16.735	18.672	16.969	12.948
																							1809.08	117.996	107.407	96.233	90.366	80.12	75.997
																							1809.16	99.085	93.764	76.017	76.746	69.86	61.818
																							1809.24	98.249	92.633	73.809	76.499	68.858	57.971
																							1809.32	97.806	92.605	73.157	76.145	68.355	57.758
																							1809.4	98.623	92.338	73.529	76.275	68.801	57.568
																							1809.48	98.037	93.07	73.557	75.99	68.885	57.457
																							1809.56	97.82	92.651	73.756	76.119	69.084	58.181
																							1809.64	97.815	92.952	73.18	77.156	69.197	57.598
																							1809.72	98.353	93.571	73.47	76.721	69.54	57.536
																							1809.92	41.553	40.149	31.321	31.664	29.799	24.587
																								41.553	40.149		31.664	29.799

## Sheet: Figure 5
time	WT_1	WT_2	L1ko_1	L1ko_2	L1ko_3	WT_4	WT_5	WT_3	L1ko_4	L1ko_5
0.09	0	0	0	0	0	0	0	0	0	0
0.701667	0.44863	0.477454	0.216176	0.214198	0.246976	0.440757	0.463333	0.447394	0.29784	0.284976
1.36833	1.11963	1.16966	0.49569	0.51821	0.537907	1.40117	1.40334	1.22357	0.642656	0.620723
2.035	1.48208	1.46703	0.661917	0.695852	0.717078	1.71881	1.68806	1.55557	0.845897	0.778691
2.36833	1.55861	1.5557	0.741794	0.775957	0.805954	1.80448	1.73989	1.63708	0.93712	0.868903
3.035	1.69861	1.64339	0.873358	0.909827	0.942572	1.91518	1.83676	1.73424	1.06652	0.961998
3.36833	1.75017	1.68498	0.922985	0.952014	0.993837	1.96427	1.84786	1.76608	1.12058	0.99481
4.035	1.75448	1.71553	1.0026	1.01854	1.05647	1.96576	1.84862	1.7839	1.18048	1.02403
4.70167	1.82261	1.73589	1.05523	1.07116	1.13145	1.97435	1.83485	1.78878	1.2161	1.08158
5.36833	1.84562	1.76355	1.1016	1.12928	1.18148	1.95801	1.83115	1.80461	1.25628	1.10555
6.035	1.88127	1.82473	1.14535	1.16483	1.22108	1.94706	1.82815	1.79616	1.30949	1.13999
6.70167	1.91058	1.82224	1.17697	1.19807	1.31189	1.95307	1.84852	1.81319	1.327	1.16885
7.36833	1.95537	1.8991	1.21423	1.22587	1.32828	1.95675	1.8421	1.80138	1.36384	1.19619
8.035	1.96362	1.90978	1.24351	1.2644	1.35263	1.96673	1.86443	1.80533	1.38986	1.22073
8.70167	1.98543	1.92097	1.27883	1.28939	1.39434	1.97783	1.85901	1.84022	1.4354	1.24631
9.36833	2.00753	1.96168	1.29906	1.31505	1.42233	1.99025	1.88601	1.83519	1.45138	1.25907
10.035	2.02039	1.97058	1.33019	1.32982	1.44105	2.00565	1.89696	1.85259	1.49929	1.30122
10.8683	1.07814	1.10843	1.12975	1.07122	1.00206	1.35814	1.20147	1.20711	0.939735	0.866598
11.2017	0.839918	0.8814	1.00103	0.934573	0.888143	1.12623	1.00557	0.99211	0.840948	0.788725
11.535	0.687319	0.731032	0.909832	0.859743	0.809168	0.965396	0.842833	0.833382	0.761589	0.720766
12.535	0.506555	0.528998	0.75118	0.695729	0.654206	0.741464	0.624256	0.561554	0.630253	0.593916
13.535	0.44047	0.460554	0.640999	0.612784	0.574563	0.615704	0.535866	0.448965	0.551264	0.526632
14.535	0.39303	0.414003	0.525512	0.508206	0.505323	0.49664	0.467738	0.382717	0.477711	0.466568
15.535	0.351935	0.362652	0.405054	0.405948	0.449194	0.386914	0.393703	0.316141	0.414383	0.403917
16.535	0.325008	0.338255	0.316116	0.332975	0.401973	0.314183	0.336263	0.290874	0.367263	0.347741
17.535	0.312573	0.332074	0.255975	0.292586	0.376115	0.280551	0.295634	0.274206	0.330088	0.304692
18.535	0.299662	0.306508	0.227139	0.2736	0.349103	0.266905	0.271787	0.264148	0.308807	0.282337
19.535	0.30147	0.307755	0.210339	0.265837	0.35198	0.256854	0.262483	0.260433	0.291767	0.271809
20.535	0.293216	0.308526	0.201439	0.247555	0.344774	0.252912	0.260726	0.260698	0.289342	0.26378
20.8683	1.85678	1.84517	0.912511	1.00108	1.17169	1.83191	1.79066	1.70539	1.15894	1.05214
21.2017	2.11373	2.08638	1.13265	1.20932	1.34848	2.27436	2.18124	1.99847	1.35937	1.24201
21.535	2.21473	2.15299	1.24976	1.32272	1.43776	2.37936	2.22995	2.06608	1.48	1.33236
21.8683	2.22984	2.21293	1.32951	1.38854	1.54254	2.3889	2.24438	2.08147	1.54203	1.38819
22.2017	2.27277	2.2576	1.4003	1.43541	1.58667	2.39124	2.23146	2.08905	1.57904	1.40495
22.535	2.27654	2.27793	1.4296	1.4554	1.59534	2.39177	2.21893	2.09896	1.60092	1.43326
22.8683	2.26898	2.23938	1.46425	1.49687	1.64417	2.38156	2.20751	2.09502	1.60533	1.43555
23.2017	2.27069	2.26259	1.4858	1.4965	1.65239	2.34565	2.193	2.09513	1.61715	1.44405
23.535	2.25153	2.23401	1.48423	1.53127	1.64643	2.31146	2.15694	2.08068	1.63546	1.44404
24.2017	2.21321	2.21003	1.48223	1.5158	1.66925	2.21651	2.08516	2.03355	1.5941	1.40678
24.8683	2.19652	2.12567	1.47606	1.52816	1.64948	2.157	2.02516	2.00707	1.60251	1.43769
25.535	2.17254	2.13487	1.48032	1.51044	1.62986	2.11608	2.01063	1.98067	1.60461	1.42972
26.2017	2.20392	2.13353	1.48899	1.51158	1.67363	2.09862	1.98939	1.98379	1.60938	1.44649
26.8683	2.1877	2.16362	1.51111	1.52203	1.68692	2.10661	1.99938	1.97065	1.64017	1.44552
27.535	2.20603	2.15831	1.52187	1.54048	1.70877	2.10426	1.99176	1.98657	1.65202	1.45356
28.2017	2.22985	2.15073	1.54593	1.55337	1.71688	2.10946	2.01862	1.97318	1.67812	1.46405
28.8683	2.23953	2.19313	1.55556	1.55882	1.75728	2.12235	2.01995	1.98175	1.68473	1.48798
29.535	2.2362	2.18615	1.55165	1.57818	1.76264	2.12963	2.02346	1.99972	1.68093	1.49458
30.2017	2.24407	2.19606	1.57649	1.58266	1.79271	2.12971	2.03761	2.00268	1.68024	1.5036
31.035	1.31718	1.33765	1.37469	1.31927	1.30295	1.53132	1.32039	1.36179	1.13272	1.04184
31.3683	1.08573	1.09212	1.21512	1.17125	1.16517	1.31248	1.12566	1.14237	1.0147	0.951456
31.7017	0.92356	0.934132	1.12376	1.09537	1.05938	1.16532	0.992828	0.983591	0.940526	0.887528
32.035	0.826887	0.840531	1.04899	1.02725	1.00071	1.06618	0.90311	0.880488	0.891961	0.847074
32.7017	0.699772	0.708178	0.936045	0.91169	0.896284	0.940236	0.763052	0.715682	0.793294	0.759033
33.7017	0.592287	0.598237	0.813397	0.794937	0.791978	0.824012	0.67509	0.601697	0.706136	0.672571
34.7017	0.520813	0.526043	0.680663	0.670604	0.696384	0.673089	0.585421	0.506219	0.631307	0.603368
35.7017	0.461268	0.459953	0.528794	0.534608	0.607378	0.501595	0.491609	0.443999	0.539969	0.511232
36.5472	0.429552	0.433817	0.396661	0.437772	0.551142	0.390047	0.417573	0.408869	0.472467	0.444027
37.5472	0.41254	0.409138	0.32227	0.395524	0.518812	0.343625	0.359118	0.398686	0.419065	0.398574
38.5472	0.405303	0.411931	0.292349	0.374925	0.501824	0.325421	0.338383	0.388475	0.392343	0.369626
39.5472	0.394788	0.40082	0.277418	0.356963	0.491399	0.318065	0.325376	0.387667	0.383681	0.349375
40.5472	0.386479	0.395928	0.265327	0.344033	0.48863	0.312047	0.319911	0.382279	0.366955	0.339083

## Sheet: Figure 6
Panel C					Panel D
geno	width	count	freq		geno	stack	count	freq
WT	200	0	0		L1ko	2	44	18.2573
WT	250	5	3.04878		L1ko	3	87	36.0996
WT	300	9	5.4878		L1ko	4	61	25.3112
WT	350	15	9.14634		L1ko	5	17	7.05394
WT	400	24	14.6341		L1ko	6	13	5.39419
WT	450	23	14.0244		L1ko	7	13	5.39419
WT	500	27	16.4634		L1ko	8	3	1.24481
WT	550	21	12.8049		L1ko	9	1	0.414938
WT	600	10	6.09756		L1ko	10	0	0
WT	650	11	6.70732		L1ko	11	1	0.414938
WT	700	9	5.4878		L1ko	12	1	0.414938
WT	800	5	3.04878		WT	2	19	8.83721
WT	900	5	3.04878		WT	3	46	21.3953
L1ko	200	5	2.89017		WT	4	57	26.5116
L1ko	250	16	9.24855		WT	5	40	18.6047
L1ko	300	48	27.7457		WT	6	31	14.4186
L1ko	350	41	23.6994		WT	7	7	3.25581
L1ko	400	34	19.6532		WT	8	6	2.7907
L1ko	450	16	9.24855		WT	9	3	1.39535
L1ko	500	7	4.04624		WT	10	3	1.39535
L1ko	550	4	2.31214		WT	11	0	0
L1ko	600	0	0		WT	12	2	0.930233
L1ko	650	2	1.15607		WT	13	0	0
L1ko	700	0	0		WT	14	0	0
L1ko	800	0	0		WT	15	1	0.465116
L1ko	900	0	0

## Sheet: Supp. Fig 2
geno	light	NPQ	negqP	negqL	PSII
WT	92	1.10797	0.130867	0.239276	0.45307
WT	200	1.07118	0.168452	0.320621	0.474606
WT	335	1.11048	0.240602	0.436213	0.44843
WT	846	1.98671	0.349853	0.505351	0.307704
WT	1365	2.19511	0.665156	0.784611	0.152248
WT	1878	2.41953	0.678924	0.766245	0.113959
WT	92	1.04135	0.188391	0.323884	0.418338
WT	200	1.00172	0.211108	0.387673	0.455448
WT	335	1.0986	0.279844	0.487186	0.42559
WT	846	1.80098	0.304527	0.463358	0.342783
WT	1365	2.20377	0.691922	0.801454	0.136668
WT	1878	2.4423	0.691696	0.773734	0.106029
L1ko - D2	92	0.580062	0.162274	0.324382	0.499744
L1ko - D2	200	0.592249	0.192529	0.398452	0.516807
L1ko - D2	335	0.717364	0.264607	0.491225	0.461332
L1ko - D2	846	1.3362	0.366241	0.539407	0.32103
L1ko - D2	1365	1.42907	0.717501	0.833879	0.139562
L1ko - D2	1878	1.68491	0.713785	0.791227	0.0978755
L1ko - D2	92	0.525622	0.168139	0.333737	0.496194
L1ko - D2	200	0.515695	0.178612	0.378123	0.527636
L1ko - D2	335	0.651164	0.250997	0.474186	0.470678
L1ko - D2	846	1.20684	0.350537	0.52891	0.337246
L1ko - D2	1365	1.38363	0.719224	0.832463	0.136028
L1ko - D2	1878	1.56087	0.669116	0.756389	0.115381
L1ko - C2a	92	0.630029	0.152786	0.30513	0.499274
L1ko - C2a	200	0.657895	0.170851	0.354649	0.518254
L1ko - C2a	335	0.79698	0.242225	0.451467	0.463471
L1ko - C2a	846	1.42526	0.366934	0.531982	0.310251
L1ko - C2a	1365	1.48795	0.737707	0.844988	0.126962
L1ko - C2a	1878	1.66805	0.71391	0.793325	0.100104
L1ko - C2a	92	0.589098	0.181719	0.348625	0.478754
L1ko - C2a	200	0.561379	0.178247	0.374444	0.523969
L1ko - C2a	335	0.675081	0.247312	0.470807	0.474706
L1ko - C2a	846	1.28276	0.356839	0.530474	0.327321
L1ko - C2a	1365	1.44436	0.719731	0.830884	0.133776
L1ko - C2a	1878	1.64175	0.709047	0.787542	0.099671
L1ko - C2b	92	0.687441	0.164958	0.320393	0.485139
L1ko - C2b	200	0.727884	0.190404	0.381129	0.500422
L1ko - C2b	335	0.833463	0.258381	0.474696	0.455691
L1ko - C2b	846	1.37801	0.341065	0.518565	0.34229
L1ko - C2b	1365	1.53714	0.700281	0.81982	0.145811
L1ko - C2b	1878	1.71944	0.683408	0.771468	0.114146
L1ko - C2b	92	0.589397	0.189914	0.35681	0.467745
L1ko - C2b	200	0.601823	0.196923	0.394896	0.50133
L1ko - C2b	335	0.731565	0.272843	0.492857	0.446404
L1ko - C2b	846	1.23761	0.337495	0.512541	0.341527
L1ko - C2b	1365	1.43599	0.725496	0.835602	0.131769
L1ko - C2b	1878	1.63559	0.722995	0.799321	0.0954884
WT	92	1.05356	0.125877	0.231738	0.456812
WT	200	1.05785	0.152729	0.294554	0.481491
WT	335	1.23401	0.220425	0.392475	0.438372
WT	846	2.16547	0.370368	0.512601	0.277472
WT	1365	2.25703	0.688345	0.798607	0.138068
WT	1878	2.52356	0.727596	0.804676	0.0957901
WT	92	0.888375	0.165546	0.302958	0.453567
WT	200	0.84965	0.188062	0.367858	0.488763
WT	335	1.13725	0.263269	0.457585	0.424656
WT	846	1.77445	0.314264	0.471828	0.333944
WT	1365	2.04776	0.720709	0.824045	0.125401
WT	1878	2.18916	0.708805	0.791511	0.104491
L1ko - D2	92	0.538803	0.128844	0.266207	0.516002
L1ko - D2	200	0.567532	0.144609	0.317134	0.544014
L1ko - D2	335	0.774079	0.232982	0.437425	0.467377
L1ko - D2	846	1.45305	0.380784	0.54142	0.296695
L1ko - D2	1365	1.52685	0.730441	0.835857	0.126117
L1ko - D2	1878	1.72443	0.715311	0.791856	0.0966644
L1ko - D2	92	0.430804	0.138577	0.295195	0.530558
L1ko - D2	200	0.457594	0.161631	0.360614	0.55179
L1ko - D2	335	0.712137	0.254069	0.46898	0.458251
L1ko - D2	846	1.19549	0.345364	0.523505	0.340285
L1ko - D2	1365	1.34215	0.738612	0.848377	0.129382
L1ko - D2	1878	1.52494	0.726292	0.8065	0.0994523
L1ko - C2a	92	0.547122	0.144514	0.293018	0.50681
L1ko - C2a	200	0.575096	0.154351	0.332877	0.536313
L1ko - C2a	335	0.781952	0.225054	0.420554	0.464862
L1ko - C2a	846	1.37214	0.374169	0.535645	0.301462
L1ko - C2a	1365	1.38064	0.714254	0.830464	0.139934
L1ko - C2a	1878	1.60442	0.728438	0.804333	0.0943574
L1ko - C2a	92	0.451187	0.157795	0.315105	0.499232
L1ko - C2a	200	0.499675	0.175305	0.367019	0.522355
L1ko - C2a	335	0.724147	0.263678	0.467578	0.436078
L1ko - C2a	846	1.19568	0.361498	0.52331	0.309208
L1ko - C2a	1365	1.25751	0.74075	0.845064	0.123439
L1ko - C2a	1878	1.44181	0.740466	0.812062	0.0881648
L1ko - C2b	92	0.504718	0.134735	0.280652	0.519921
L1ko - C2b	200	0.518105	0.155427	0.342668	0.546422
L1ko - C2b	335	0.75177	0.231002	0.43349	0.467112
L1ko - C2b	846	1.34764	0.372821	0.536616	0.305237
L1ko - C2b	1365	1.45217	0.739813	0.845244	0.124734
L1ko - C2b	1878	1.6496	0.719639	0.798285	0.0985187
L1ko - C2b	92	0.406831	0.139022	0.301831	0.539404
L1ko - C2b	200	0.398679	0.164	0.374237	0.561774
L1ko - C2b	335	0.683666	0.25335	0.469619	0.460519
L1ko - C2b	846	1.10323	0.33676	0.517798	0.349631
L1ko - C2b	1365	1.29981	0.706267	0.824624	0.143529
L1ko - C2b	1878	1.56844	0.746765	0.819817	0.0891074

## Sheet: Supp. Fig 6
Fluorescence decay
time	L1ko	WT		geno	frac100ps
0	0.000273482	0.000532341		WT	69.71
0.0244	0.000437568	0.000286649		WT	67.97
0.0488	0.000382865	0.00047092		WT	69.68
0.0732	0.000328173	0.000286649		L1ko	75.62
0.0976	0.000273482	0.000266175		L1ko	75
0.122	0.000273482	0.000450446		L1ko	75.62
0.1464	0.00049226	0.000245692
0.1709	0.000273482	0.000389016
0.1953	0.00049226	0.000429973
0.2197	0.000437568	0.000368543
0.2441	0.000273482	0.000491393
0.2685	0.000328173	0.00040949
0.2929	0.000328173	0.00040949
0.3173	0.00049226	0.000389016
0.3418	0.000218778	0.000429973
0.3662	0.000437568	0.000368543
0.3906	0.00049226	0.000286649
0.415	0.000328173	0.000859936
0.4394	0.000711038	0.00118754
0.4638	0.00360986	0.00372639
0.4882	0.0092435	0.0103401
0.5126	0.0263627	0.0260848
0.5371	0.0505387	0.0504087
0.5615	0.0870204	0.0879386
0.5859	0.167042	0.160115
0.6103	0.319808	0.318115
0.6347	0.566148	0.549497
0.6591	0.784438	0.765752
0.6835	0.953287	0.908851
0.708	0.996386	0.977544
0.7324	1	1
0.7568	0.974564	0.985061
0.7812	0.921293	0.946162
0.8056	0.856917	0.893883
0.83	0.77979	0.822616
0.8544	0.726791	0.769708
0.8789	0.660722	0.714545
0.9033	0.610838	0.672639
0.9277	0.562159	0.634633
0.9521	0.535086	0.597087
0.9765	0.512718	0.556807
1.0009	0.475791	0.538795
1.0253	0.457413	0.516696
1.0498	0.436466	0.496881
1.0742	0.418587	0.477713
1.0986	0.396049	0.455971
1.123	0.381228	0.444565
1.1474	0.379694	0.434906
1.1718	0.361759	0.416621
1.1962	0.354212	0.40388
1.2207	0.347586	0.400141
1.2451	0.337414	0.383905
1.2695	0.318331	0.38009
1.2939	0.323582	0.369445
1.3183	0.309306	0.359128
1.3427	0.313784	0.351715
1.3671	0.301202	0.344198
1.3916	0.292781	0.341661
1.416	0.286007	0.331204
1.4404	0.284745	0.324749
1.4648	0.270299	0.316781
1.4892	0.27189	0.307629
1.5136	0.260297	0.302246
1.538	0.254501	0.299746
1.5625	0.245692	0.292465
1.5869	0.240282	0.286874
1.6113	0.243669	0.276961
1.6357	0.242578	0.272254
1.6601	0.234429	0.267443
1.6845	0.229451	0.262379
1.7089	0.232235	0.256319
1.7334	0.218676	0.253885
1.7578	0.219165	0.250305
1.7822	0.211402	0.241642
1.8066	0.213857	0.240289
1.831	0.20215	0.236033
1.8554	0.205981	0.228188
1.8798	0.200184	0.22551
1.9043	0.197615	0.222146
1.9287	0.191103	0.21726
1.9531	0.189409	0.211501
1.9775	0.185363	0.210476
2.0019	0.185363	0.204115
2.0263	0.180658	0.202988
2.0507	0.179078	0.199117
2.0751	0.177214	0.194137
2.0996	0.164416	0.189862
2.124	0.17152	0.188819
2.1484	0.17027	0.185765
2.1728	0.167644	0.18196
2.1972	0.164519	0.178906
2.2216	0.158233	0.175937
2.246	0.15413	0.170638
2.2705	0.155221	0.169182
2.2949	0.146254	0.163779
2.3193	0.150357	0.159495
2.3437	0.150846	0.158085
2.3681	0.147459	0.155633
2.3925	0.140514	0.155276
2.4169	0.142867	0.155219
2.4414	0.135922	0.151367
2.4658	0.131876	0.149262
2.4902	0.130069	0.146246
2.5146	0.129467	0.144405
2.539	0.127444	0.138617
2.5634	0.128751	0.139124
2.5878	0.120658	0.136813
2.6123	0.12558	0.131288
2.6367	0.120272	0.134455
2.6611	0.115521	0.131551
2.6855	0.11601	0.128131
2.7099	0.113493	0.125228
2.7343	0.108078	0.124777
2.7587	0.113383	0.119863
2.7832	0.111688	0.119205
2.8076	0.107202	0.117833
2.832	0.110047	0.114535
2.8564	0.10496	0.115419
2.8808	0.101679	0.113267
2.9052	0.100749	0.111078
2.9296	0.0953344	0.108841
2.9541	0.0971393	0.10637
2.9785	0.0958811	0.103561
3.0029	0.0935841	0.105544
3.0273	0.0969199	0.100404
3.0517	0.088224	0.10016
3.0761	0.0914507	0.099549
3.1005	0.0923259	0.0929757
3.125	0.0865828	0.0958188
3.1494	0.0882786	0.0929343
3.1738	0.0818785	0.0899662
3.1982	0.0861452	0.0887785
3.2226	0.0824809	0.0907648
3.247	0.0828094	0.0882458
3.2714	0.0794178	0.085318
3.2959	0.0820433	0.084417
3.3203	0.0787609	0.0837208
3.3447	0.0781051	0.083701
3.3691	0.0779414	0.0832914
3.3935	0.0738384	0.0823903
3.4179	0.0736202	0.0819806
3.4423	0.0737293	0.0748764
3.4668	0.0741123	0.0768214
3.4912	0.0695183	0.075879
3.5156	0.069299	0.0744875
3.54	0.0725257	0.0729719
3.5644	0.0648141	0.0718049
3.5888	0.0642674	0.0696345
3.6132	0.066345	0.072706
3.6376	0.0670565	0.0682016
3.6621	0.0646504	0.0692248
3.6865	0.0631728	0.0665019
3.7109	0.0668383	0.0667274
3.7353	0.0619704	0.0643315
3.7597	0.0580321	0.0643926
3.7841	0.0603292	0.064557
3.8085	0.0586879	0.0610758
3.833	0.0554067	0.059766
3.8574	0.0570467	0.0613013
3.8818	0.0545861	0.0606051
3.9062	0.0556794	0.0575139
3.9306	0.0543667	0.0583529
3.955	0.0532188	0.0555886
3.9794	0.0543121	0.0549742
4.0039	0.0491169	0.0562031
4.0283	0.0501557	0.0529475
4.0527	0.0474211	0.0537461
4.0771	0.0466005	0.0516377
4.1015	0.0490623	0.0524157
4.1259	0.0472018	0.0509819
4.1503	0.0477496	0.0510843
4.1748	0.0473666	0.0481359
4.1992	0.0459436	0.0488528
4.2236	0.0447956	0.048709
4.248	0.0438659	0.0482176
4.2724	0.0431544	0.0489345
4.2968	0.0427714	0.0469482
4.3212	0.043975	0.043406
4.3457	0.0432635	0.0443691
4.3701	0.0415689	0.0438974
4.3945	0.0425532	0.0435291
4.4189	0.0408029	0.0415428
4.4433	0.0410768	0.0415024
4.4677	0.0412405	0.0411538
4.4921	0.0375762	0.0411745
4.5166	0.0391071	0.041011
4.541	0.037084	0.040171
4.5654	0.0387241	0.0408879
4.5898	0.0370283	0.039782
4.6142	0.0341846	0.0385333
4.6386	0.0336925	0.0383285
4.663	0.0340755	0.0371822
4.6875	0.0340755	0.038165
4.7119	0.0353337	0.0369567
4.7363	0.0350052	0.0351555
4.7607	0.0327628	0.0335789
4.7851	0.0335834	0.0343155
4.8095	0.0336379	0.0351752
4.8339	0.0333095	0.034152
4.8584	0.0323798	0.0327182
4.8828	0.0322706	0.0335169
4.9072	0.031067	0.0333327
4.9316	0.0295906	0.0326778
4.956	0.0292621	0.0325754
4.9804	0.0317785	0.0303025
5.0048	0.02609	0.0304463
5.0293	0.0260354	0.0298929
5.0537	0.0299179	0.0299549
5.0781	0.0289882	0.0296063
5.1025	0.0298088	0.0284393
5.1269	0.0277857	0.027682
5.1513	0.0269106	0.0283576
5.1757	0.0274027	0.0271493
5.2001	0.0259252	0.0273748
5.2246	0.0273482	0.0270065
5.249	0.0248863	0.02762
5.2734	0.02505	0.0268223
5.2978	0.0253239	0.0259823
5.3222	0.0276755	0.0252457
5.3466	0.0243397	0.0249789
5.371	0.0252694	0.0263713
5.3955	0.0239021	0.0252457
5.4199	0.0219324	0.0249789
5.4443	0.0247227	0.0239763
5.4687	0.0224257	0.0242422
5.4931	0.0220426	0.022768
5.5175	0.0219881	0.0225425
5.5419	0.021222	0.0237508
5.5664	0.0225893	0.0227887
5.5908	0.02237	0.0218059
5.6152	0.0184329	0.0215597
5.6396	0.0209481	0.0216621
5.664	0.0219881	0.0220107
5.6884	0.017776	0.0214169
5.7128	0.0196899	0.0208635
5.7373	0.0194717	0.0208231
5.7617	0.0184875	0.0199427
5.7861	0.018925	0.0187757
5.8105	0.0180499	0.0197172
5.8349	0.0189796	0.0192869
5.8593	0.0184875	0.0182223
5.8837	0.0169008	0.0190416
5.9082	0.0170099	0.0188575
5.9326	0.0165178	0.0172808
5.957	0.017776	0.0178953
5.9814	0.0173929	0.0177722
6.0058	0.0161348	0.0168919
6.0302	0.0162996	0.0175674
6.0546	0.0153698	0.0171578
6.0791	0.0165723	0.0156018
6.1035	0.0149868	0.015909
6.1279	0.015862	0.016625
6.1523	0.0146583	0.015397
6.1767	0.0154244	0.0163798
6.2011	0.0153698	0.0150493
6.2255	0.0151505	0.0148032
6.25	0.0146583	0.0141483
6.2744	0.0138377	0.015008
6.2988	0.0153141	0.0156835
6.3232	0.0151505	0.0154787
6.3476	0.0138377	0.0142093
6.372	0.0120874	0.0148445
6.3964	0.0131274	0.0142911
6.4209	0.0143299	0.0141689
6.4453	0.0149868	0.01339
6.4697	0.0131274	0.0132059
6.4941	0.0139469	0.0136362
6.5185	0.0123613	0.0132679
6.5429	0.0123613	0.013452
6.5673	0.0129626	0.0129606
6.5918	0.0131274	0.0127971
6.6162	0.0118692	0.0133083
6.6406	0.0132365	0.0123875
6.665	0.0123068	0.0124072
6.6894	0.0112126	0.011773
6.7138	0.0124704	0.0122851
6.7382	0.0120329	0.0121206
6.7626	0.0106656	0.0113023
6.7871	0.00989987	0.0124692
6.8115	0.0103374	0.0112609
6.8359	0.0106656	0.0118961
6.8603	0.00995454	0.0111585
6.8847	0.0114862	0.0110561
6.9091	0.0104468	0.0116499
6.9335	0.00880592	0.0114864
6.958	0.00902471	0.0105647
6.9824	0.00907949	0.0114864
7.0068	0.0103921	0.0105854
7.0312	0.0113219	0.00997087
7.0556	0.0103374	0.0102377
7.08	0.00897004	0.0100122
7.1044	0.00973575	0.00933647
7.1289	0.00995454	0.0102781
7.1533	0.0092435	0.00927502
7.1777	0.00989987	0.00978671
7.2021	0.00831367	0.0090498
7.2265	0.00962641	0.00931598
7.2509	0.00902471	0.00919318
7.2753	0.00940762	0.00894748
7.2998	0.00831367	0.00939773
7.3242	0.00864191	0.0091727
7.3486	0.00738384	0.00861984
7.373	0.00782142	0.00884506
7.3974	0.0076573	0.00861984
7.4218	0.00732917	0.00851752
7.4462	0.00716505	0.00857888
7.4707	0.00754796	0.00790322
7.4951	0.00705571	0.00913173
7.5195	0.00853246	0.00833318
7.5439	0.0076573	0.00843559
7.5683	0.00711038	0.00790322
7.5927	0.00754796	0.00839463
7.6171	0.00732917	0.00769849
7.6416	0.00694626	0.00788274
7.666	0.00732917	0.00751423
7.6904	0.00743863	0.00716612
7.7148	0.00678226	0.00759607
7.7392	0.00711038	0.00749375
7.7636	0.00711038	0.00708428
7.788	0.00623522	0.00741182
7.8125	0.00721984	0.00661336
7.8369	0.00656347	0.00659288
7.8613	0.00661814	0.0070638
7.8857	0.00760263	0.00708428
7.9101	0.00607122	0.00587626
7.9345	0.00629001	0.00628573
7.9589	0.00607122	0.00687955
7.9834	0.00508672	0.00661336
8.008	0.00656347	0.00636766
8.032	0.00574298	0.00642901
8.057	0.00601655	0.00589674
8.081	0.00585243	0.00612196
8.105	0.00618056	0.00589674
8.13	0.00536018	0.00601954
8.154	0.00557897	0.00563056
8.179	0.00656347	0.00659288
8.203	0.00623522	0.00573288
8.227	0.00557897	0.00548727
8.252	0.00486793	0.00640863
8.276	0.00519606	0.00542582
8.301	0.00459436	0.00591722
8.325	0.0049226	0.00524157
8.35	0.00448502	0.00505722
8.374	0.00514139	0.00511867
8.398	0.00508672	0.00536437
8.423	0.00579776	0.005692
8.447	0.00443035	0.00511867
8.472	0.00453969	0.00530292
8.496	0.00453969	0.00487297
8.52	0.00415689	0.00450446
8.545	0.00497727	0.00503674
8.569	0.00410211	0.00479113
8.594	0.00399277	0.00450446
8.618	0.00453969	0.00472968
8.643	0.00399277	0.00456582
8.667	0.00437568	0.00468872
8.691	0.00311761	0.00489345
8.716	0.00437568	0.00444301
8.74	0.00464914	0.00419731
8.765	0.00388332	0.00460678
8.789	0.0033364	0.00481152
8.813	0.00399277	0.00438157
8.838	0.0033364	0.00460678
8.862	0.00459436	0.00468872
8.887	0.00344585	0.0043406
8.911	0.00360986	0.00405403
8.936	0.00355519	0.00432021
8.96	0.00311761	0.00356262
8.984	0.00306294	0.00391065
9.009	0.0039381	0.00468872
9.033	0.00278948	0.00405403
9.058	0.00311761	0.00436108
9.082	0.00421156	0.00325547
9.106	0.00295361	0.00436108
9.131	0.00410211	0.00415635
9.155	0.00328173	0.00382881
9.18	0.00328173	0.00360359
9.204	0.00317228	0.00348069
9.228	0.00295361	0.00335789
9.253	0.00257069	0.00315315
9.277	0.00311761	0.00374688
9.302	0.00300827	0.00292784
9.326	0.00251603	0.00348069
9.351	0.00262536	0.00315315
9.375	0.00268003	0.00370591
9.399	0.00251603	0.00280504
9.424	0.00284415	0.00348069
9.448	0.00257069	0.00372639
9.473	0.00273482	0.00298929
9.497	0.00273482	0.00329644
9.521	0.00284415	0.00307122
9.546	0.00278948	0.0027231
9.57	0.00300827	0.00307122
9.595	0.00246124	0.00300977
9.619	0.00251603	0.00315315
9.644	0.00322706	0.00321451
9.668	0.00268003	0.00274359
9.692	0.00268003	0.002846
9.717	0.00191433	0.00288697
9.741	0.00289882	0.0026003
9.766	0.0023519	0.00245692
9.79	0.00322706	0.00315315
9.814	0.00289882	0.0027231
9.839	0.0023519	0.0026003
9.863	0.00207845	0.00276407
9.888	0.00268003	0.00253885
9.912	0.00218778	0.00221131
9.936	0.00224257	0.0026003
9.961	0.00224257	0.00305074
9.985	0.00257069	0.00233412
10.01	0.00268003	0.00208841
10.034	0.00229724	0.00241605
10.059	0.00191433	0.00286649
10.083	0.00136741	0.00237508
10.107	0.00202378	0.0023546
10.132	0.0015862	0.00212938
10.156	0.00202378	0.00200648
10.181	0.00191433	0.00231363
10.205	0.0015862	0.00206793
10.229	0.00180499	0.0023546
10.254	0.00229724	0.00231363
10.278	0.00191433	0.00262078
10.303	0.00153141	0.00208841
10.327	0.00213312	0.00206793
10.352	0.0015862	0.00243653
10.376	0.00207845	0.0021089
10.4	0.0017502	0.00176078
10.425	0.00169554	0.00217035
10.449	0.00246124	0.00221131
10.474	0.00164087	0.00178126
10.498	0.00196899	0.00196561
10.522	0.00164087	0.00221131
10.547	0.00136741	0.00165846
10.571	0.00185966	0.00200648
10.596	0.00131274	0.00196561
10.62	0.00218778	0.0021089
10.644	0.00098452	0.00198609
10.669	0.00202378	0.00200648
10.693	0.00196899	0.00165846
10.718	0.00180499	0.00176078
10.742	0.00103921	0.00188368
10.767	0.00153141	0.0016175
10.791	0.0017502	0.00149469
10.815	0.00147675	0.00184271
10.84	0.00202378	0.00165846
10.864	0.00196899	0.00206793
10.889	0.00147675	0.00159701
10.913	0.00180499	0.00176078
10.937	0.00120329	0.00149469
10.962	0.00136741	0.00169943
10.986	0.00153141	0.00139228
11.011	0.00136741	0.00184271
11.035	0.00169554	0.0018632
11.06	0.0017502	0.00178126
11.084	0.00131274	0.00182223
11.108	0.00125796	0.00169943
11.133	0.00131274	0.00155605
11.157	0.00103921	0.00128986
11.182	0.00142208	0.00180175
11.206	0.0017502	0.00159701
11.23	0.000875125	0.00135131
11.255	0.00136741	0.00149469
11.279	0.00164087	0.00163798
11.304	0.00125796	0.00137179
11.328	0.00136741	0.00159701
11.352	0.00114862	0.00114658
11.377	0.00142208	0.00128986
11.401	0.0010939	0.00145373
11.426	0.00098452	0.00159701
11.45	0.00142208	0.00128986
11.475	0.00136741	0.00135131
11.499	0.00142208	0.00112609
11.523	0.00131274	0.00118754
11.548	0.00103921	0.00149469
11.572	0.00136741	0.00120802
11.597	0.00114862	0.00126947
11.621	0.00098452	0.00114658
11.645	0.00136741	0.00112609
11.67	0.00114862	0.000900883
11.694	0.000711038	0.00120802
11.719	0.00142208	0.00159701
11.743	0.000929817	0.00100329
11.768	0.00142208	0.00128986
11.792	0.00103921	0.00124899
11.816	0.00120329	0.00114658
11.841	0.00114862	0.00108513
11.865	0.00131274	0.00126947
11.89	0.00103921	0.00104425
11.914	0.00103921	0.00122851
11.938	0.000820433	0.00100329
11.963	0.00114862	0.00104425
11.987	0.00103921	0.00112609
12.012	0.00125796	0.00128986
12.036	0.00120329	0.000716612
12.061	0.00103921	0.000962323
12.085	0.000656347	0.00108513
12.109	0.000656347	0.000962323
12.134	0.00125796	0.00120802
12.158	0.00076573	0.00112609
12.183	0.00076573	0.000962323
12.207	0.00114862	0.00104425
12.231	0.000820433	0.000982806
12.256	0.000601655	0.000921366
12.28	0.000711038	0.00108513
12.305	0.00103921	0.000778042
12.329	0.000875125	0.000962323
12.353	0.000546952	0.00104425
12.378	0.00076573	0.00120802
12.402	0.00114862	0.00131034
12.427	0.000546952	0.00128986
12.451	0.00076573	0.000696138
12.476	0.000601655	0.00108513
12.5	0.000656347	0.00120802
12.524	0.000875125	0.00122851
12.549	0.000929817	0.000675665
12.573	0.000382865	0.00116706
12.598	0.000656347	0.000982806
12.622	0.000711038	0.000921366
12.646	0.00076573	0.000921366
12.671	0.000875125	0.000696138
12.695	0.00076573	0.000982806
12.72	0.000382865	0.00114658
12.744	0.000820433	0.00094184
12.769	0.000711038	0.000900883
12.793	0.00098452	0.000859936
12.817	0.00136741	0.000921366
12.842	0.000875125	0.000818989
12.866	0.00076573	0.000859936
12.891	0.00103921	0.000859936
12.915	0.000656347	0.000798515
12.939	0.000875125	0.000614244
12.964	0.000437568	0.000798515
12.988	0.00049226	0.000737085
0	0.000382557	0.00021197
0.0244	0.000191274	0.000370961
0.0488	0.000255041	0.000635923
0.0732	0.000223153	0.000264976
0.0976	0.000255041	0.000423953
0.122	0.00028692	0.000317968
0.1464	0.000350678	0.000635923
0.1709	0.00028692	0.000264976
0.1953	0.000350678	0.000476946
0.2197	0.000318799	0.000370961
0.2441	0.000255041	0.000423953
0.2685	0.000159395	0.000317968
0.2929	0.000191274	0.000529938
0.3173	0.000223153	0.00021197
0.3418	0.000223153	0.000635923
0.3662	0.000637588	0.00021197
0.3906	0.000414436	0.000423953
0.415	0.000223153	0.000476946
0.4394	0.00105199	0.00111287
0.4638	0.00264603	0.00254375
0.4882	0.0091813	0.00927402
0.5126	0.0249935	0.023795
0.5371	0.0520275	0.0479066
0.5615	0.0867759	0.082194
0.5859	0.158828	0.152672
0.6103	0.317174	0.308056
0.6347	0.561781	0.552091
0.6591	0.797113	0.775722
0.6835	0.926513	0.898724
0.708	0.991367	0.981716
0.7324	1	1
0.7568	0.980319	0.969422
0.7812	0.9057	0.931849
0.8056	0.845321	0.870803
0.83	0.777544	0.818278
0.8544	0.724814	0.753679
0.8789	0.668353	0.70848
0.9033	0.609246	0.672546
0.9277	0.570609	0.619663
0.9521	0.539436	0.592045
0.9765	0.495795	0.563435
1.0009	0.480199	0.535927
1.0253	0.447809	0.525698
1.0498	0.428871	0.503821
1.0742	0.414463	0.481764
1.0986	0.399035	0.478006
1.123	0.381758	0.448061
1.1474	0.374907	0.451035
1.1718	0.357306	0.432324
1.1962	0.349527	0.415954
1.2207	0.339612	0.406248
1.2451	0.33161	0.411342
1.2695	0.323227	0.391681
1.2939	0.319467	0.385582
1.3183	0.308819	0.378643
1.3427	0.304892	0.36862
1.3671	0.290234	0.355376
1.3916	0.291794	0.362741
1.416	0.281907	0.348437
1.4404	0.273719	0.343343
1.4648	0.268743	0.335399
1.4892	0.263452	0.320405
1.5136	0.257779	0.313824
1.538	0.25156	0.309749
1.5625	0.246621	0.310919
1.5869	0.245377	0.30683
1.6113	0.234599	0.298088
1.6357	0.233801	0.30153
1.6601	0.228676	0.292319
1.6845	0.228509	0.27705
1.7089	0.217545	0.277477
1.7334	0.218214	0.269533
1.7578	0.212987	0.266394
1.7822	0.206805	0.255641
1.8066	0.199889	0.25549
1.831	0.200455	0.244407
1.8554	0.195934	0.245522
1.8798	0.19469	0.240483
1.9043	0.189361	0.237729
1.9287	0.186465	0.24515
1.9531	0.181619	0.22973
1.9775	0.180282	0.227665
2.0019	0.179066	0.224691
2.0263	0.171064	0.213402
2.0507	0.168353	0.210552
2.0751	0.164083	0.21018
2.0996	0.159079	0.208321
2.124	0.153212	0.200047
2.1484	0.162486	0.197197
2.1728	0.156944	0.20079
2.1972	0.15117	0.195173
2.2216	0.153695	0.188867
2.246	0.144699	0.185054
2.2705	0.147893	0.188922
2.2949	0.144829	0.181075
2.3193	0.139027	0.180978
2.3437	0.13912	0.179753
2.3681	0.139027	0.170322
2.3925	0.137978	0.175196
2.4169	0.130004	0.16995
2.4414	0.128667	0.167362
2.4658	0.1272	0.162213
2.4902	0.124267	0.15654
2.5146	0.123153	0.156761
2.539	0.12267	0.158399
2.5634	0.118112	0.147591
2.5878	0.120405	0.14945
2.6123	0.119291	0.151198
2.6367	0.116357	0.149175
2.6611	0.11282	0.144301
2.6855	0.107789	0.142125
2.7099	0.111901	0.13593
2.7343	0.109153	0.130631
2.7587	0.10441	0.129677
2.7832	0.102497	0.126762
2.8076	0.102943	0.128034
2.832	0.0964631	0.127716
2.8564	0.0971964	0.123052
2.8808	0.0971407	0.119714
2.9052	0.0936595	0.118388
2.9296	0.0941422	0.11966
2.9541	0.0939194	0.118706
2.9785	0.0892629	0.117222
3.0029	0.0896454	0.11044
3.0273	0.0913034	0.112295
3.0517	0.0876365	0.108214
3.0761	0.0862022	0.105882
3.1005	0.0821222	0.106412
3.125	0.0821222	0.101801
3.1494	0.0819625	0.102809
3.1738	0.0785509	0.0995223
3.1982	0.0823765	0.10053
3.2226	0.0786149	0.101536
3.247	0.0752042	0.0963433
3.2714	0.0752042	0.094329
3.2959	0.0753314	0.094435
3.3203	0.0722076	0.0951771
3.3447	0.0690512	0.0887654
3.3691	0.0692109	0.090832
3.3935	0.0697846	0.0895075
3.4179	0.068796	0.0872276
3.4423	0.0677757	0.0889238
3.4668	0.0668511	0.0865929
3.4912	0.0674573	0.0832542
3.5156	0.0662458	0.084631
3.54	0.0650659	0.0829361
3.5644	0.0624202	0.0792794
3.5888	0.0628667	0.0802858
3.6132	0.0602841	0.0772128
3.6376	0.0564909	0.076205
3.6621	0.0556294	0.0736084
3.6865	0.0559803	0.0749329
3.7109	0.0576699	0.0719122
3.7353	0.0555663	0.07239
3.7597	0.0534942	0.0740325
3.7841	0.0560128	0.0692096
3.8085	0.053717	0.0696873
3.833	0.0523784	0.0689452
3.8574	0.0510072	0.0669847
3.8818	0.0513897	0.0671967
3.9062	0.0483615	0.0624275
3.9306	0.0500511	0.0652362
3.955	0.0490949	0.0648121
3.9794	0.04715	0.0596189
4.0039	0.0471175	0.0630099
4.0283	0.045078	0.0600416
4.0527	0.045428	0.0601476
4.0771	0.0431331	0.0582407
4.1015	0.0434515	0.0587708
4.1259	0.0442805	0.057551
4.1503	0.0427822	0.0522517
4.1748	0.0427506	0.0573926
4.1992	0.0420173	0.0552724
4.2236	0.0433244	0.0531535
4.248	0.0404549	0.0527818
4.2724	0.0406146	0.0521457
4.2968	0.0404874	0.0516694
4.3212	0.0388934	0.054796
4.3457	0.039339	0.0530475
4.3701	0.039754	0.0513513
4.3945	0.0387653	0.0479066
4.4189	0.0372995	0.0466344
4.4433	0.0365661	0.0470585
4.4677	0.0356099	0.0438258
4.4921	0.0362468	0.0472705
4.5166	0.0350037	0.0450443
4.541	0.0333457	0.0466881
4.5654	0.0326448	0.0438258
4.5898	0.0340791	0.0434018
4.6142	0.0330273	0.0409112
4.6386	0.0333141	0.0421296
4.663	0.0296157	0.0411232
4.6875	0.0317202	0.0432957
4.7119	0.0318474	0.0430837
4.7363	0.0323895	0.0384742
4.7607	0.0294244	0.0403288
4.7851	0.0314018	0.0410172
4.8095	0.0280217	0.0386863
4.8339	0.0297113	0.0379442
4.8584	0.0293288	0.0372021
4.8828	0.0276392	0.0365123
4.9072	0.0274805	0.0369364
4.9316	0.0270655	0.0330676
4.956	0.0268743	0.0359823
4.9804	0.0267787	0.0349758
5.0048	0.0258541	0.0353476
5.0293	0.0254716	0.0359299
5.0537	0.0256313	0.032751
5.0781	0.024547	0.0331213
5.1025	0.0247707	0.0317968
5.1269	0.0251207	0.0317431
5.1513	0.0237505	0.0342338
5.1757	0.0236224	0.0297826
5.2001	0.0222837	0.030577
5.2246	0.0239733	0.0302067
5.249	0.0229855	0.0315848
5.2734	0.0220925	0.0311071
5.2978	0.0214872	0.0278744
5.3222	0.020881	0.0284581
5.3466	0.0207213	0.027504
5.371	0.0217416	0.0284044
5.3955	0.0210407	0.0285105
5.4199	0.0210722	0.0288822
5.4443	0.0216144	0.0259138
5.4687	0.0189686	0.026868
5.4931	0.0188089	0.0266036
5.5175	0.0186493	0.0266036
5.5419	0.0195423	0.0241116
5.5664	0.0186818	0.0246417
5.5908	0.0194142	0.0259138
5.6152	0.019223	0.0244297
5.6396	0.0169281	0.0248014
5.664	0.0165132	0.0260199
5.6884	0.0170553	0.0241116
5.7128	0.0178203	0.0233709
5.7373	0.0149192	0.0245357
5.7617	0.0153983	0.0216747
5.7861	0.0162588	0.0202442
5.8105	0.0170553	0.0213567
5.8349	0.0153983	0.0210386
5.8593	0.016386	0.0215687
5.8837	0.0161307	0.0228932
5.9082	0.0155895	0.0207206
5.9326	0.0160991	0.0210386
5.957	0.0159079	0.0213567
5.9814	0.0153026	0.0188661
6.0058	0.014378	0.0198202
6.0302	0.0141227	0.0191304
6.0546	0.0141868	0.0187601
6.0791	0.0141868	0.0187064
6.1035	0.0141227	0.0196082
6.1279	0.0131981	0.0194485
6.1523	0.0131665	0.018336
6.1767	0.0128797	0.0181763
6.2011	0.0146964	0.0169055
6.2255	0.0130069	0.0161635
6.25	0.0125928	0.0187601
6.2744	0.0133578	0.018336
6.2988	0.0131025	0.017912
6.3232	0.0124016	0.0177536
6.3476	0.0121779	0.0181763
6.372	0.0116998	0.0168518
6.3964	0.0116357	0.0159514
6.4209	0.0117638	0.0159514
6.4453	0.0111576	0.0176476
6.4697	0.0110304	0.0174356
6.4941	0.0109033	0.0168518
6.5185	0.0106155	0.0167995
6.5429	0.0125603	0.0162695
6.5673	0.0107752	0.0162158
6.5918	0.0105524	0.014839
6.6162	0.0107436	0.0137789
6.6406	0.0107436	0.0144149
6.665	0.0100743	0.0151033
6.6894	0.00962774	0.0138312
6.7138	0.0106795	0.0148913
6.7382	0.00991459	0.0138312
6.7626	0.0101374	0.0126126
6.7871	0.00956368	0.0127716
6.8115	0.00969179	0.0136724
6.8359	0.00902191	0.0131425
6.8603	0.00911753	0.0141492
6.8847	0.00854372	0.0123476
6.9091	0.00937245	0.0132485
6.9335	0.00883067	0.0142029
6.958	0.00863934	0.0125066
6.9824	0.00806554	0.0126126
7.0068	0.00832055	0.0137789
7.0312	0.00835249	0.0107578
7.0556	0.00857557	0.0113937
7.08	0.00790615	0.0126656
7.1044	0.00863934	0.0116588
7.1289	0.00796992	0.0110228
7.1533	0.00707724	0.0116057
7.1777	0.00790615	0.0119236
7.2021	0.00736418	0.0105988
7.2265	0.00844811	0.0116057
7.2509	0.0074598	0.00985695
7.2753	0.00714101	0.0118706
7.2998	0.00672661	0.0111817
7.3242	0.00685407	0.0106518
7.3486	0.00720479	0.00964493
7.373	0.00647159	0.0105988
7.3974	0.00682222	0.0103869
7.4218	0.0074598	0.0104928
7.4462	0.00726857	0.00980395
7.4707	0.00653528	0.00810802
7.4951	0.00707724	0.0101218
7.5195	0.00653528	0.00959192
7.5439	0.00599332	0.00895598
7.5683	0.00730041	0.00996283
7.5927	0.00570646	0.00853207
7.6171	0.00612087	0.00800215
7.6416	0.00592963	0.00996283
7.666	0.00663099	0.00784313
7.6904	0.00577024	0.00768411
7.7148	0.0057383	0.00832005
7.7392	0.00605709	0.00953891
7.7636	0.00497317	0.00837305
7.788	0.00557891	0.00832005
7.8125	0.00592963	0.00779012
7.8369	0.0058977	0.00816103
7.8613	0.00510072	0.00816103
7.8857	0.0053239	0.00922102
7.9101	0.00602525	0.00752509
7.9345	0.00503695	0.00794914
7.9589	0.00484571	0.00641224
7.9834	0.00449499	0.00805515
8.008	0.00388934	0.00773712
8.032	0.00503695	0.00710118
8.057	0.00510072	0.00667727
8.081	0.00500511	0.00752509
8.105	0.00433559	0.00752509
8.13	0.00455876	0.00773712
8.154	0.0040168	0.0073132
8.179	0.00433559	0.00768411
8.203	0.00487755	0.00673027
8.227	0.00465438	0.00704817
8.252	0.00414436	0.00678328
8.276	0.00366617	0.00699517
8.301	0.00408058	0.00514036
8.325	0.00430375	0.00598832
8.35	0.00449499	0.00646524
8.374	0.00353862	0.00678328
8.398	0.00446315	0.0054584
8.423	0.00439937	0.00567043
8.447	0.00372995	0.0054584
8.472	0.00388934	0.00482246
8.496	0.00411242	0.00535239
8.52	0.00363424	0.00551141
8.545	0.00385741	0.00503449
8.569	0.0036024	0.00498148
8.594	0.00392118	0.00567043
8.618	0.00369801	0.00630622
8.643	0.00372995	0.00503449
8.667	0.00290104	0.00540539
8.691	0.00315605	0.00625336
8.716	0.00347484	0.00524638
8.74	0.00395303	0.00450443
8.765	0.00328361	0.00487547
8.789	0.00341116	0.00450443
8.813	0.00312421	0.00551141
8.838	0.00334738	0.00429254
8.862	0.00325167	0.00503449
8.887	0.00363424	0.00540539
8.911	0.00328361	0.00402751
8.936	0.00325167	0.00551141
8.96	0.00328361	0.0039215
8.984	0.00357055	0.00503449
9.009	0.00299666	0.00450443
9.033	0.00302859	0.00450443
9.058	0.0027098	0.00418653
9.082	0.0027098	0.00455743
9.106	0.00280542	0.0036036
9.131	0.00318799	0.00408051
9.155	0.00293288	0.00455743
9.18	0.00258225	0.00429254
9.204	0.00242286	0.00450443
9.228	0.00318799	0.00408051
9.253	0.00280542	0.00492848
9.277	0.00274165	0.00349758
9.302	0.00280542	0.00339157
9.326	0.0022953	0.00408051
9.351	0.00366617	0.00386863
9.375	0.00232724	0.00333857
9.399	0.00334738	0.0036036
9.424	0.00242286	0.00386863
9.448	0.0027098	0.00408051
9.473	0.00216784	0.00355059
9.497	0.00210407	0.00233172
9.521	0.00261409	0.00413352
9.546	0.0024547	0.00307367
9.57	0.0024547	0.00312668
9.595	0.00223153	0.00317968
9.619	0.00223153	0.00381562
9.644	0.0022953	0.00323269
9.668	0.0022953	0.00291465
9.692	0.00216784	0.00307367
9.717	0.00248663	0.00317968
9.741	0.00159395	0.00243773
9.766	0.00226346	0.0032857
9.79	0.00261409	0.00339157
9.814	0.00194467	0.00296766
9.839	0.00181712	0.00291465
9.863	0.00210407	0.00259675
9.888	0.00184905	0.00270263
9.912	0.00213591	0.0032857
9.936	0.00162588	0.00243773
9.961	0.00191274	0.00222571
9.985	0.00210407	0.00264976
10.01	0.00181712	0.00312668
10.034	0.0017215	0.00291465
10.059	0.00168966	0.00259675
10.083	0.00207213	0.00249074
10.107	0.00146649	0.00264976
10.132	0.00178528	0.00249074
10.156	0.00226346	0.00259675
10.181	0.00184905	0.00227872
10.205	0.00149833	0.00243773
10.229	0.00188089	0.00254375
10.254	0.00178528	0.00270263
10.278	0.00165772	0.00291465
10.303	0.00175334	0.00249074
10.327	0.00159395	0.00270263
10.352	0.00178528	0.00233172
10.376	0.00159395	0.0021727
10.4	0.00146649	0.00307367
10.425	0.0017215	0.0032857
10.449	0.00143455	0.00270263
10.474	0.00168966	0.00291465
10.498	0.00127516	0.00233172
10.522	0.00159395	0.00233172
10.547	0.00184905	0.00264976
10.571	0.00149833	0.00286165
10.596	0.00156211	0.0021197
10.62	0.00159395	0.00238473
10.644	0.00168966	0.0021197
10.669	0.00149833	0.00243773
10.693	0.00140271	0.00238473
10.718	0.00143455	0.00222571
10.742	0.00153026	0.00259675
10.767	0.00111576	0.0018548
10.791	0.00156211	0.0021727
10.815	0.00149833	0.00227872
10.84	0.00143455	0.0018548
10.864	0.00102014	0.00158977
10.889	0.00111576	0.00233172
10.913	0.00162588	0.00233172
10.937	0.00124332	0.0021197
10.962	0.00102014	0.0021197
10.986	0.00121138	0.00153677
11.011	0.00105199	0.00174879
11.035	0.00102014	0.0018018
11.06	0.00162588	0.00243773
11.084	0.00140271	0.00153677
11.108	0.00127516	0.00174879
11.133	0.00140271	0.00121887
11.157	0.00086075	0.00132485
11.182	0.00146649	0.00153677
11.206	0.000892629	0.0014839
11.23	0.00124332	0.00105988
11.255	0.00137078	0.00132485
11.279	0.00130709	0.00127186
11.304	0.000828871	0.00169579
11.328	0.000796992	0.00196082
11.352	0.00121138	0.0018018
11.377	0.000988303	0.00190781
11.401	0.000988303	0.00121887
11.426	0.0011477	0.00137789
11.45	0.00121138	0.00153677
11.475	0.000701346	0.0014839
11.499	0.000892629	0.00132485
11.523	0.00168966	0.00169579
11.548	0.00117954	0.00158977
11.572	0.000956368	0.00174879
11.597	0.0011477	0.00116588
11.621	0.00102014	0.000847907
11.645	0.000605709	0.00143089
11.67	0.00111576	0.00164278
11.694	0.000892629	0.00164278
11.719	0.000605709	0.0014839
11.743	0.000605709	0.00116588
11.768	0.00111576	0.00164278
11.792	0.00086075	0.00158977
11.816	0.00108392	0.00158977
11.841	0.000733234	0.00153677
11.865	0.00102014	0.00132485
11.89	0.000924508	0.00158977
11.914	0.000956368	0.00111287
11.938	0.00086075	0.00137789
11.963	0.000956368	0.00158977
11.987	0.000669467	0.00100688
12.012	0.000892629	0.00132485
12.036	0.000892629	0.0014839
12.061	0.000828871	0.00111287
12.085	0.000796992	0.00153677
12.109	0.00105199	0.00116588
12.134	0.000637588	0.0014839
12.158	0.00105199	0.00127186
12.183	0.00057383	0.000900899
12.207	0.000828871	0.00121887
12.231	0.000733234	0.000635923
12.256	0.000446315	0.00137789
12.28	0.000669467	0.00116588
12.305	0.000796992	0.00132485
12.329	0.000637588	0.00137789
12.353	0.000637588	0.0014839
12.378	0.000701346	0.00100688
12.402	0.000796992	0.000582931
12.427	0.000637588	0.000953891
12.451	0.000446315	0.000847907
12.476	0.000605709	0.00100688
12.5	0.00057383	0.000794914
12.524	0.000765113	0.00127186
12.549	0.000828871	0.000635923
12.573	0.000765113	0.0014839
12.598	0.000637588	0.00121887
12.622	0.000701346	0.00116588
12.646	0.000510072	0.000529938
12.671	0.000637588	0.00121887
12.695	0.000605709	0.00105988
12.72	0.000796992	0.000794914
12.744	0.000828871	0.000635923
12.769	0.000446315	0.000953891
12.793	0.000701346	0.000741922
12.817	0.000541951	0.00100688
12.842	0.000541951	0.000847907
12.866	0.000637588	0.00100688
12.891	0.000510072	0.000847907
12.915	0.000828871	0.000529938
12.939	0.000446315	0.000900899
12.964	0.000701346	0.00116588
12.988	0.000765113	0.000635923
0	0.000433594	0.000421439
0.0244	0.000512435	0.000180612
0.0488	0.000512435	0.000361224
0.0732	0.000394184	0.000541852
0.0976	0.000236512	0.000481638
0.122	0.000354764	0.000481638
0.1464	0.000118251	0.000481638
0.1709	0.000275923	0.000421439
0.1953	0.000433594	0.000361224
0.2197	0.000354764	0.000421439
0.2441	0.000354764	0.000481638
0.2685	0.000197092	0.000541852
0.2929	0.000394184	0.000361224
0.3173	0.000275923	0.000722464
0.3418	0.000315343	0.000361224
0.3662	0.000275923	0.00066225
0.3906	0.000433594	0.00108369
0.415	0.000551855	0.00066225
0.4394	0.00114315	0.00102349
0.4638	0.00382356	0.0028898
0.4882	0.00985411	0.00812763
0.5126	0.0283413	0.0242031
0.5371	0.0532537	0.0467198
0.5615	0.0895183	0.0864545
0.5859	0.165867	0.162498
0.6103	0.324449	0.298496
0.6347	0.562058	0.540226
0.6591	0.786547	0.772304
0.6835	0.927387	0.927032
0.708	0.985117	0.975562
0.7324	1	1
0.7568	0.959121	0.97243
0.7812	0.899168	0.927093
0.8056	0.83708	0.853523
0.83	0.781386	0.795913
0.8544	0.71362	0.734194
0.8789	0.656076	0.699276
0.9033	0.610741	0.657989
0.9277	0.56009	0.61488
0.9521	0.523	0.577071
0.9765	0.496269	0.548522
1.0009	0.470332	0.526373
1.0253	0.446568	0.509328
1.0498	0.424058	0.493021
1.0742	0.410771	0.477241
1.0986	0.399657	0.460211
1.123	0.376598	0.436541
1.1474	0.367688	0.428004
1.1718	0.35445	0.428365
1.1962	0.349682	0.406261
1.2207	0.335445	0.403731
1.2451	0.331626	0.39825
1.2695	0.321962	0.379655
1.2939	0.314041	0.373812
1.3183	0.299971	0.374053
1.3427	0.294096	0.359779
1.3671	0.289523	0.349314
1.3916	0.290825	0.343592
1.416	0.277538	0.342568
1.4404	0.268834	0.327571
1.4648	0.265994	0.324982
1.4892	0.258778	0.320585
1.5136	0.252159	0.31006
1.538	0.253618	0.311023
1.5625	0.245178	0.303314
1.5869	0.248771	0.291931
1.6113	0.237726	0.28916
1.6357	0.236551	0.292533
1.6601	0.226691	0.282475
1.6845	0.223304	0.271408
1.7089	0.220817	0.264421
1.7334	0.213571	0.26406
1.7578	0.21361	0.259422
1.7822	0.202487	0.248822
1.8066	0.201067	0.251653
1.831	0.197601	0.245027
1.8554	0.195633	0.240224
1.8798	0.193146	0.230467
1.9043	0.191452	0.232876
1.9287	0.186919	0.232214
1.9531	0.184157	0.232394
1.9775	0.180613	0.216674
2.0019	0.172055	0.214627
2.0263	0.173798	0.211435
2.0507	0.166817	0.204162
2.0751	0.170009	0.204102
2.0996	0.15964	0.203017
2.124	0.1568	0.199464
2.1484	0.158024	0.198741
2.1728	0.161138	0.188623
2.1972	0.150181	0.191333
2.2216	0.148056	0.18784
2.246	0.151601	0.182058
2.2705	0.146597	0.178504
2.2949	0.143366	0.177059
2.3193	0.14131	0.171819
2.3437	0.14084	0.16953
2.3681	0.139107	0.166233
2.3925	0.132958	0.166835
2.4169	0.135239	0.161053
2.4414	0.132723	0.167437
2.4658	0.123225	0.1578
2.4902	0.126133	0.158162
2.5146	0.125037	0.158885
2.539	0.124479	0.151296
2.5634	0.123852	0.150212
2.5878	0.118849	0.147503
2.6123	0.118447	0.147382
2.6367	0.114863	0.141421
2.6611	0.110643	0.139556
2.6855	0.112141	0.135883
2.7099	0.10753	0.132994
2.7343	0.105875	0.134438
2.7587	0.107216	0.136184
2.7832	0.105679	0.129201
2.8076	0.104455	0.13215
2.832	0.105914	0.129261
2.8564	0.101302	0.12035
2.8808	0.0981886	0.121615
2.9052	0.0960619	0.124083
2.9296	0.0971654	0.121012
2.9541	0.092396	0.115894
2.9785	0.0936179	0.118965
3.0029	0.0923167	0.117039
3.0273	0.0896759	0.107166
3.0517	0.0884931	0.10873
3.0761	0.0823049	0.108068
3.1005	0.0873896	0.104094
3.125	0.0817527	0.103132
3.1494	0.0821473	0.0989174
3.1738	0.0825017	0.102409
3.1982	0.0819505	0.103433
3.2226	0.0781269	0.095787
3.247	0.0817928	0.0971105
3.2714	0.0782444	0.095787
3.2959	0.0769833	0.0921747
3.3203	0.0739087	0.093438
3.3447	0.0748546	0.092896
3.3691	0.0739881	0.0882011
3.3935	0.0691785	0.0852499
3.4179	0.06906	0.0924744
3.4423	0.0657495	0.0863942
3.4668	0.0668139	0.0821195
3.4912	0.0669715	0.0853101
3.5156	0.0655126	0.0818785
3.54	0.0657495	0.080555
3.5644	0.0623597	0.0812763
3.5888	0.0625174	0.0780856
3.6132	0.0610976	0.0792902
3.6376	0.0601909	0.0765212
3.6621	0.0574718	0.0745938
3.6865	0.0581416	0.075678
3.7109	0.0581024	0.0715236
3.7353	0.0573925	0.0708009
3.7597	0.0553432	0.0708611
3.7841	0.0559738	0.0711623
3.8085	0.0529384	0.0728487
3.833	0.0544365	0.0679114
3.8574	0.0541604	0.0698372
3.8818	0.0518349	0.0638776
3.9062	0.0517164	0.067008
3.9306	0.0517556	0.0653231
3.955	0.0502977	0.0636366
3.9794	0.0502183	0.0644196
4.0039	0.0512435	0.0609881
4.0283	0.0478929	0.0618313
4.0527	0.0488779	0.0617108
4.0771	0.0462371	0.057677
4.1015	0.0461588	0.0573156
4.1259	0.043754	0.0569542
4.1503	0.0458827	0.0545465
4.1748	0.0456457	0.0565326
4.1992	0.042769	0.0541249
4.2236	0.0428082	0.0544261
4.248	0.0426897	0.053342
4.2724	0.0406404	0.0534624
4.2968	0.041034	0.0534022
4.3212	0.0417047	0.0538238
4.3457	0.0418623	0.0526794
4.3701	0.0399305	0.050332
4.3945	0.0382356	0.0493683
4.4189	0.037605	0.0470209
4.4433	0.0383932	0.0475012
4.4677	0.0369343	0.0485251
4.4921	0.0396544	0.0472001
4.5166	0.0378018	0.0465391
4.541	0.0345697	0.0453345
4.5654	0.0363037	0.0453345
4.5898	0.0335445	0.0414211
4.6142	0.0333085	0.0439492
4.6386	0.0327171	0.0437083
4.663	0.0333869	0.0426859
4.6875	0.0338206	0.0413006
4.7119	0.0311799	0.0397347
4.7363	0.0324802	0.0429871
4.7607	0.0281445	0.0408188
4.7851	0.0301547	0.0388328
4.8095	0.0305092	0.0417825
4.8339	0.0313375	0.0369657
4.8584	0.0316528	0.0356421
4.8828	0.0295241	0.0375077
4.9072	0.0281054	0.0387123
4.9316	0.0293665	0.0360622
4.956	0.0276324	0.0374475
4.9804	0.0275531	0.036002
5.0048	0.0272378	0.0361827
5.0293	0.0258191	0.0346785
5.0537	0.0272378	0.0354614
5.0781	0.0264888	0.0305241
5.1025	0.024084	0.0320886
5.1269	0.0243601	0.0329318
5.1513	0.0251092	0.033775
5.1757	0.0247547	0.0327511
5.2001	0.0244394	0.0323897
5.2246	0.0226652	0.0326307
5.249	0.0214041	0.0303435
5.2734	0.0225869	0.0305844
5.2978	0.02507	0.0273335
5.3222	0.021877	0.0282957
5.3466	0.0215226	0.0297412
5.371	0.0225076	0.0288377
5.3955	0.0227445	0.027213
5.4199	0.0213649	0.0269721
5.4443	0.0186057	0.0298014
5.4687	0.0201821	0.0277551
5.4931	0.0200636	0.0267312
5.5175	0.0207735	0.0241429
5.5419	0.0198668	0.0263698
5.5664	0.0206159	0.0260687
5.5908	0.0194722	0.0261891
5.6152	0.0184481	0.0271528
5.6396	0.0180535	0.0249846
5.664	0.0192363	0.0219746
5.6884	0.0173837	0.0209507
5.7128	0.01695	0.0257675
5.7373	0.0184872	0.0230587
5.7617	0.0165162	0.0225167
5.7861	0.0184481	0.0217939
5.8105	0.0184481	0.0208303
5.8349	0.017699	0.0214326
5.8593	0.0166738	0.0222758
5.8837	0.0171859	0.0198079
5.9082	0.0158063	0.0195067
5.9326	0.0152149	0.0211314
5.957	0.0169891	0.0208303
5.9814	0.0152551	0.0223962
6.0058	0.0156888	0.0213121
6.0302	0.0148213	0.0191453
6.0546	0.0162793	0.0200488
6.0791	0.0151758	0.020109
6.1035	0.0155312	0.0189647
6.1279	0.015728	0.0184828
6.1523	0.0142691	0.0187237
6.1767	0.0143875	0.019567
6.2011	0.0143875	0.015774
6.2255	0.012535	0.0172782
6.25	0.0132047	0.0175192
6.2744	0.0134025	0.018001
6.2988	0.0122197	0.018001
6.3232	0.0138755	0.0168581
6.3476	0.0126926	0.0171578
6.372	0.0126926	0.0173987
6.3964	0.011786	0.017218
6.4209	0.012771	0.0159547
6.4453	0.0118251	0.0184226
6.4697	0.0119044	0.015232
6.4941	0.0108009	0.0156536
6.5185	0.011549	0.0166775
6.5429	0.0115098	0.0156536
6.5673	0.0128895	0.0147503
6.5918	0.0111554	0.0154729
6.6162	0.011313	0.0140881
6.6406	0.0106032	0.0145696
6.665	0.0104455	0.0155331
6.6894	0.0107608	0.0149308
6.7138	0.0108401	0.0146298
6.7382	0.0114707	0.0139676
6.7626	0.0104455	0.0138471
6.7871	0.00938147	0.0141481
6.8115	0.0106825	0.0130645
6.8359	0.0106032	0.0133655
6.8603	0.00985411	0.012342
6.8847	0.00953921	0.0118002
6.9091	0.00949976	0.0119808
6.9335	0.00886909	0.0137268
6.958	0.00938147	0.0131849
6.9824	0.00894791	0.0113788
7.0068	0.00918437	0.0138471
7.0312	0.00894791	0.0116798
7.0556	0.00867199	0.0124625
7.08	0.0100117	0.0114991
7.1044	0.00906619	0.0105359
7.1289	0.00812014	0.0105359
7.1533	0.00851434	0.0121012
7.1777	0.00882963	0.0110176
7.2021	0.00800186	0.0124625
7.2265	0.00894791	0.0110778
7.2509	0.0075683	0.0105961
7.2753	0.00839606	0.0104154
7.2998	0.00752884	0.00963275
7.3242	0.00685871	0.0108369
7.3486	0.00717409	0.00927153
7.373	0.00760766	0.00963275
7.3974	0.00717409	0.0101747
7.4218	0.00764712	0.0099339
7.4462	0.0079624	0.0108369
7.4707	0.00697699	0.00963275
7.4951	0.0079624	0.00842877
7.5195	0.00654343	0.0099339
7.5439	0.0062675	0.00987367
7.5683	0.00662225	0.00987367
7.5927	0.00685871	0.0109573
7.6171	0.00591266	0.0102349
7.6416	0.00689817	0.00951244
7.666	0.0062675	0.00915122
7.6904	0.0056762	0.00806755
7.7148	0.00674053	0.00842877
7.7392	0.00591266	0.00830831
7.7636	0.00595212	0.00752564
7.788	0.0058733	0.00885007
7.8125	0.0064646	0.00806755
7.8369	0.00500607	0.00933176
7.8613	0.00603094	0.00848885
7.8857	0.00532145	0.00999398
7.9101	0.00634632	0.00812763
7.9345	0.00579448	0.00921145
7.9589	0.00540027	0.00788686
7.9834	0.00496671	0.00710418
8.008	0.00591266	0.00800732
8.032	0.00524263	0.00758586
8.057	0.00599158	0.0077664
8.081	0.00496671	0.00710418
8.105	0.00480897	0.00650219
8.13	0.00480897	0.00614097
8.154	0.00496671	0.00698372
8.179	0.0054791	0.00794709
8.203	0.00532145	0.00535829
8.227	0.00429658	0.00583982
8.252	0.00409948	0.00668273
8.276	0.00465133	0.00782663
8.301	0.0043754	0.00590005
8.325	0.0039812	0.00710418
8.35	0.00413894	0.0062012
8.374	0.00500607	0.00577974
8.398	0.00374474	0.00716441
8.423	0.00480897	0.00559905
8.447	0.00441486	0.00752564
8.472	0.00441486	0.00668273
8.496	0.00390238	0.00523783
8.52	0.00453305	0.00626127
8.545	0.0041783	0.00481638
8.569	0.00425712	0.00583982
8.594	0.0043754	0.00559905
8.618	0.00366592	0.00553883
8.643	0.00425712	0.00541852
8.667	0.00354764	0.00487661
8.691	0.00346881	0.00590005
8.716	0.00386292	0.00553883
8.74	0.00338999	0.00559905
8.765	0.00394184	0.00499706
8.789	0.00335053	0.00529806
8.813	0.0037841	0.00553883
8.838	0.00413894	0.00421439
8.862	0.00465133	0.00481638
8.887	0.00335053	0.00523783
8.911	0.00366592	0.00559905
8.936	0.00362646	0.00427461
8.96	0.00366592	0.00596028
8.984	0.00331107	0.00469607
9.009	0.00338999	0.00535829
9.033	0.00346881	0.00451538
9.058	0.00271987	0.00397347
9.082	0.00303515	0.0037327
9.106	0.00342935	0.00481638
9.131	0.00287751	0.00487661
9.155	0.00299579	0.00397347
9.18	0.00315343	0.00385316
9.204	0.00283815	0.00451538
9.228	0.00279869	0.00451538
9.253	0.00260159	0.00355217
9.277	0.00291697	0.00481638
9.302	0.00283815	0.00427461
9.326	0.00204974	0.00421439
9.351	0.00319289	0.00421439
9.375	0.00279869	0.00391339
9.399	0.00256213	0.00391339
9.424	0.00220738	0.00421439
9.448	0.00299579	0.00415416
9.473	0.00252277	0.0037327
9.497	0.00260159	0.00337148
9.521	0.00256213	0.00391339
9.546	0.00256213	0.00433469
9.57	0.00291697	0.00463584
9.595	0.00315343	0.0028898
9.619	0.00232566	0.00355217
9.644	0.00268041	0.0040337
9.668	0.00197092	0.0028898
9.692	0.0022862	0.00252857
9.717	0.00315343	0.00409393
9.741	0.00252277	0.00337148
9.766	0.00232566	0.0025888
9.79	0.00220738	0.00331125
9.814	0.00197092	0.00295002
9.839	0.00256213	0.00276949
9.863	0.00177382	0.00391339
9.888	0.0020892	0.00313071
9.912	0.00201028	0.0037327
9.936	0.00216802	0.00307048
9.961	0.00212856	0.00246834
9.985	0.0020892	0.00325102
10.01	0.00173436	0.00319094
10.034	0.00212856	0.0037327
10.059	0.00165554	0.00337148
10.083	0.00173436	0.00349194
10.107	0.00212856	0.00331125
10.132	0.00204974	0.0028898
10.156	0.0018921	0.00349194
10.181	0.00220738	0.00295002
10.205	0.00157672	0.00240826
10.229	0.00220738	0.00355217
10.254	0.00224684	0.00234803
10.278	0.001695	0.0028898
10.303	0.00181328	0.00216735
10.327	0.00157672	0.00270926
10.352	0.00161618	0.00240826
10.376	0.00165554	0.00307048
10.4	0.00181328	0.00282957
10.425	0.00220738	0.00264903
10.449	0.00161618	0.00282957
10.474	0.00201028	0.0025888
10.498	0.00161618	0.00210712
10.522	0.00122197	0.00210712
10.547	0.00130079	0.0025888
10.571	0.00122197	0.0028898
10.596	0.00145844	0.00228781
10.62	0.00130079	0.00246834
10.644	0.00137961	0.00240826
10.669	0.00149789	0.00252857
10.693	0.00137961	0.00174589
10.718	0.00137961	0.00228781
10.742	0.00173436	0.00264903
10.767	0.00153726	0.00325102
10.791	0.00161618	0.00234803
10.815	0.00153726	0.00246834
10.84	0.00118251	0.00198681
10.864	0.00165554	0.0025888
10.889	0.00173436	0.00204704
10.913	0.00137961	0.00204704
10.937	0.00114315	0.00186635
10.962	0.00122197	0.0025888
10.986	0.00161618	0.00174589
11.011	0.00181328	0.00210712
11.035	0.00106433	0.00210712
11.06	0.00094603	0.00204704
11.084	0.00122197	0.00264903
11.108	0.00118251	0.00162559
11.133	0.00134025	0.00156536
11.157	0.00165554	0.00180612
11.182	0.00126133	0.00156536
11.206	0.00126133	0.00210712
11.23	0.00126133	0.00210712
11.255	0.00122197	0.00174589
11.279	0.00102487	0.00180612
11.304	0.00134025	0.00228781
11.328	0.00122197	0.00132451
11.352	0.000906619	0.00210712
11.377	0.000788358	0.00144493
11.401	0.00134025	0.00174589
11.426	0.000906619	0.00186635
11.45	0.00118251	0.00168581
11.475	0.00114315	0.00174589
11.499	0.000709527	0.00138471
11.523	0.00130079	0.0012643
11.548	0.000985411	0.00132451
11.572	0.00102487	0.0012041
11.597	0.000867199	0.0011439
11.621	0.000867199	0.00180612
11.645	0.00102487	0.00138471
11.67	0.00106433	0.00174589
11.694	0.000985411	0.00192658
11.719	0.000788358	0.00156536
11.743	0.000985411	0.00156536
11.768	0.00094603	0.00174589
11.792	0.00114315	0.00168581
11.816	0.000512435	0.00162559
11.841	0.00094603	0.00168581
11.865	0.00114315	0.0012041
11.89	0.00118251	0.000903076
11.914	0.00134025	0.00192658
11.938	0.000709527	0.00132451
11.963	0.00102487	0.00138471
11.987	0.00094603	0.00132451
12.012	0.000709527	0.00150513
12.036	0.00114315	0.0012643
12.061	0.000827778	0.00138471
12.085	0.000709527	0.00144493
12.109	0.000709527	0.00180612
12.134	0.000670107	0.00180612
12.158	0.00102487	0.0012643
12.183	0.000670107	0.00162559
12.207	0.000788358	0.00102349
12.231	0.000591266	0.0012041
12.256	0.000788358	0.00132451
12.28	0.000709527	0.0012643
12.305	0.00094603	0.00186635
12.329	0.000748947	0.0011439
12.353	0.000906619	0.00138471
12.378	0.000630686	0.0012041
12.402	0.000788358	0.00132451
12.427	0.000788358	0.00108369
12.451	0.000748947	0.0011439
12.476	0.000906619	0.0012041
12.5	0.000827778	0.000903076
12.524	0.00094603	0.00168581
12.549	0.00122197	0.000842877
12.573	0.000788358	0.00150513
12.598	0.000709527	0.0011439
12.622	0.000748947	0.00102349
12.646	0.000630686	0.0012041
12.671	0.000827778	0.0012041
12.695	0.000630686	0.00108369
12.72	0.000670107	0.000842877
12.744	0.000630686	0.0012643
12.769	0.000630686	0.00162559
12.793	0.000827778	0.00108369
12.817	0.000670107	0.000782663
12.842	0.000630686	0.000782663
12.866	0.00118251	0.00150513
12.891	0.000709527	0.00102349
12.915	0.000512435	0.000963275
12.939	0.000394184	0.000842877
12.964	0.000748947	0.00102349
12.988	0.000709527	0.000602051

## Sheet: Supp. Fig 7
time	geno	VJ
0.05	WT	0.9435
4	WT	0.9436
8	WT	0.8878
12	WT	0.8342
16	WT	0.7817
20	WT	0.7366
24	WT	0.7015
0.05	WT	0.9346
4	WT	0.882
8	WT	0.7849
12	WT	0.7157
16	WT	0.6681
20	WT	0.6353
24	WT	0.6122
0.05	WT	0.9407
4	WT	0.9348
8	WT	0.8697
12	WT	0.8139
16	WT	0.7652
20	WT	0.7248
24	WT	0.6911
0.05	WT	0.9439
4	WT	0.9229
8	WT	0.85
12	WT	0.79
16	WT	0.739
20	WT	0.7013
24	WT	0.6746
0.05	WT	0.9365
4	WT	0.9222
8	WT	0.8486
12	WT	0.7874
16	WT	0.7355
20	WT	0.6974
24	WT	0.6697
0.05	WT	0.9335
4	WT	0.9636
8	WT	0.9143
12	WT	0.8625
16	WT	0.8121
20	WT	0.7666
24	WT	0.7282
0.05	WT	0.9294
4	WT	0.9538
8	WT	0.9081
12	WT	0.8642
16	WT	0.8205
20	WT	0.7797
24	WT	0.7408
0.05	Lhcb1KO	0.9064
4	Lhcb1KO	0.8544
8	Lhcb1KO	0.7874
12	Lhcb1KO	0.736
16	Lhcb1KO	0.6899
20	Lhcb1KO	0.6505
24	Lhcb1KO	0.6176
0.05	Lhcb1KO	0.9046
4	Lhcb1KO	0.8475
8	Lhcb1KO	0.7781
12	Lhcb1KO	0.7201
16	Lhcb1KO	0.6699
20	Lhcb1KO	0.6266
24	Lhcb1KO	0.5893
0.05	Lhcb1KO	0.9303
4	Lhcb1KO	0.9135
8	Lhcb1KO	0.8495
12	Lhcb1KO	0.7857
16	Lhcb1KO	0.7272
20	Lhcb1KO	0.6787
24	Lhcb1KO	0.6415
0.05	Lhcb1KO	0.9239
4	Lhcb1KO	0.9157
8	Lhcb1KO	0.849
12	Lhcb1KO	0.7898
16	Lhcb1KO	0.7376
20	Lhcb1KO	0.6926
24	Lhcb1KO	0.6561
0.05	Lhcb1KO	0.929
4	Lhcb1KO	0.902
8	Lhcb1KO	0.8326
12	Lhcb1KO	0.7711
16	Lhcb1KO	0.7165
20	Lhcb1KO	0.6721
24	Lhcb1KO	0.6364
0.05	Lhcb1KO	0.9431
4	Lhcb1KO	0.9203
8	Lhcb1KO	0.8558
12	Lhcb1KO	0.7981
16	Lhcb1KO	0.7498
20	Lhcb1KO	0.7075
24	Lhcb1KO	0.6713
0.05	Lhcb1KO	0.9364
4	Lhcb1KO	0.9229
8	Lhcb1KO	0.8508
12	Lhcb1KO	0.7895
16	Lhcb1KO	0.737
20	Lhcb1KO	0.6938
24	Lhcb1KO	0.6586

## Sheet: Supp. Fig 8
geno	light	PSII	NPQ
WT	0	0.805644	0
WT	0	0.793646	0
WT	0	0.807064	0
WT	0	0.797461	0
WT	0	0.766355	0
L1ko	0	0.767771	0
L1ko	0	0.77128	0
L1ko	0	0.7747	0
L1ko	0	0.771487	0
L1ko	0	0.737557	0
WT	40	0.475195	0.217931
WT	40	0.48323	0.342443
WT	40	0.470544	0.285553
WT	40	0.481625	0.401934
WT	40	0.44037	0.333215
L1ko	40	0.588852	0.126153
L1ko	40	0.547711	0.121024
L1ko	40	0.56746	0.199901
L1ko	40	0.599342	0.153124
L1ko	40	0.570204	0.184352
WT	95	0.45812	0.351553
WT	95	0.449213	0.546018
WT	95	0.444004	0.510582
WT	95	0.416667	0.677778
WT	95	0.295175	0.642544
L1ko	95	0.580423	0.158689
L1ko	95	0.533938	0.140489
L1ko	95	0.570747	0.281929
L1ko	95	0.588439	0.212945
L1ko	95	0.560758	0.231884
WT	150	0.445122	0.397154
WT	150	0.410623	0.655771
WT	150	0.42726	0.572281
WT	150	0.357564	0.779961
WT	150	0.223485	0.773201
L1ko	150	0.550451	0.153714
L1ko	150	0.484448	0.123639
L1ko	150	0.573051	0.248838
L1ko	150	0.574083	0.200489
L1ko	150	0.528027	0.238789
WT	380	0.278409	0.77531
WT	380	0.22036	1.01241
WT	380	0.257625	0.866013
WT	380	0.179531	1.07204
WT	380	0.106145	0.901981
L1ko	380	0.291145	0.29307
L1ko	380	0.237998	0.185884
L1ko	380	0.373772	0.397458
L1ko	380	0.331846	0.369214
L1ko	380	0.301546	0.423969
WT	620	0.185185	1.02058
WT	620	0.13992	1.14987
WT	620	0.171885	1.10313
WT	620	0.115099	1.24257
WT	620	0.0704892	0.970016
L1ko	620	0.182697	0.36743
L1ko	620	0.146769	0.236628
L1ko	620	0.24557	0.531013
L1ko	620	0.212031	0.46218
L1ko	620	0.199723	0.532594
WT	850	0.140088	1.14947
WT	850	0.105552	1.22207
WT	850	0.132013	1.26139
WT	850	0.0867314	1.34563
WT	850	0.0558568	1.03091
L1ko	850	0.13658	0.422446
L1ko	850	0.110375	0.275938
L1ko	850	0.188742	0.601987
L1ko	850	0.16139	0.523898
L1ko	850	0.155523	0.606105

[truncated: 2 more sheets: Supp. Fig 12, Supp. Fig 13]
